# Supplementary material for: Microbially guided discovery and biosynthesis of biologically active natural products
Source: Research Square preprint supplement (doi:10.21203/rs.3.rs-92116/v1), 2020-10-20
Supplement: Supplementary file 1 [file 205b3ecb855f3cac07d84e64.xlsx]

## Sheet: Sheet1
Experiment	Inhibitor	Dilution	Inhibitor conc.	% DMSO	BLANK	ELISA signal	SE	Sample size (n)	Experimental sets
Figure	Name	#	uM	v/v %	A405	A405	A405	#	#
4g	none	1	N/A	3	0.112	0.232	0.0181021	4	1
4g	dihydroartimesinic acid	1	930	3	0.112	0.319667	0.0224503	3	1
4g	amorphadiene	1	930	3	0.112	0.443667	0.0353886	3	1
4g	alpha bisabolol	1	405	3	0.112	0.233	0.0257534	3	1
4g	alpha bisabolene	1	405	3	0.112	0.541667	0.0274655	3	1
S10b	none	1	N/A	3	N/A*	0.352	N/A	1	1
S10b	alpha bisabolene	1	405	3	N/A	0.65	N/A	1	1
S10b	alpha bisabolene	1	810	3	N/A	0.437	N/A	1	1
S10b	alpha bisabolol	1	300	3	N/A	0.36	N/A	1	1
S10b	alpha bisabolol	1	600	3	N/A	0.321	N/A	1	1
S10b	alpha bisabolol	1	1000	3	N/A	0.37	N/A	1	1
S10b	amorphadiene	1	465	3	N/A	0.441	N/A	1	1
S10b	amorphadiene	1	935	3	N/A	0.601	N/A	1	1
S10b	dihydroartimesinic acid	1	1550	3	N/A	0.53	N/A	1	1
S10b	dihydroartimesinic acid	1	300	3	N/A	0.408	N/A	1	1
S10b	dihydroartimesinic acid	1	600	3	N/A	0.452	N/A	1	1
S10c	none	1	N/A	3	N/A	0.34375	0.00674125	4	1
S10c	none	0.5	N/A	3	N/A	0.324	0.009	4	1
S10c	none	0.25	N/A	3	N/A	0.268	0.021	4	1
S10c	none	0.125	N/A	3	N/A	0.2255	0.0205	4	1
S10c	amorphadiene	1	930	3	N/A	0.555667	0.0311466	3	1
S10c	amorphadiene	0.5	930	3	N/A	0.381667	0.0255365	3	1
S10c	amorphadiene	0.25	930	3	N/A	0.352333	0.014746	3	1
S10c	amorphadiene	0.125	930	3	N/A	0.215333	0.0154524	3	1
S10c	Dihydroartimesinic acid	1	930	3	N/A	0.431667	0.0148922	3	1
S10c	Dihydroartimesinic acid	0.5	930	3	N/A	0.374	0.00550757	3	1
S10c	Dihydroartimesinic acid	0.25	930	3	N/A	0.325667	0.0101708	3	1
S10c	Dihydroartimesinic acid	0.125	930	3	N/A	0.233333	0.00956266	3	1
S10c	alpha bisabolene	1	405	3	N/A	0.653667	0.0217281	3	1
S10c	alpha bisabolene	0.5	405	3	N/A	0.439	0.029339	3	1
S10c	alpha bisabolene	0.25	405	3	N/A	0.368	0.00466667	3	1
S10c	alpha bisabolene	0.125	405	3	N/A	0.239	0.011348	3	1
S10c	alpha bisabolol	1	405	3	N/A	0.345	0.0195192	3	1
S10c	alpha bisabolol	0.5	405	3	N/A	0.29	0.010116	3	1
S10c	alpha bisabolol	0.25	405	3	N/A	0.266333	0.00491031	3	1
S10c	alpha bisabolol	0.125	405	3	N/A	0.244	0.00208167	3	1
*N/A denotes a measurement for which a blank measurement was not subtracted from the value displayed in the plot.
