# Supplementary material for: Microbially guided discovery and biosynthesis of biologically active natural products
Source: Research Square preprint supplement (doi:10.21203/rs.3.rs-92116/v1), 2020-10-20
Supplement: Supplementary file 2 [file 61de0994c127b25a4800ab73.xlsx]

## Sheet: Sheet1
Experiment	Inhibitor	Enzyme	Substrate	Inhibitor	DMSO	Vo	SE Vo	Sample size (n)	Experimental sets
Figure	Name	Name	mM	μM	% (v/v)	(μM/s)	(μM/s)	#	#
2e	Amorphadiene	PTP1B(1-321)	0	0	10	0	N/A	NM*	NM
2e	Amorphadiene	PTP1B(1-321)	0	15	10	0	N/A	NM	NM
2e	Amorphadiene	PTP1B(1-321)	0	50	10	0	N/A	NM	NM
2e	Amorphadiene	PTP1B(1-321)	0	110	10	0	N/A	NM	NM
2e	Amorphadiene	PTP1B(1-321)	0.33	0	10	0.282333	0.006245	3	1
2e	Amorphadiene	PTP1B(1-321)	0.33	15	10	0.191967	0.00154955	3	1
2e	Amorphadiene	PTP1B(1-321)	0.33	50	10	0.179767	0.00656768	3	1
2e	Amorphadiene	PTP1B(1-321)	0.33	110	10	0.133633	0.00208833	3	1
2e	Amorphadiene	PTP1B(1-321)	0.67	0	10	0.3177	0.0101974	3	1
2e	Amorphadiene	PTP1B(1-321)	0.67	15	10	0.241967	0.00492172	3	1
2e	Amorphadiene	PTP1B(1-321)	0.67	50	10	0.215167	0.00581502	3	1
2e	Amorphadiene	PTP1B(1-321)	0.67	110	10	0.17138	0.00567049	3	1
2e	Amorphadiene	PTP1B(1-321)	2	0	10	0.3947	0.00234977	3	1
2e	Amorphadiene	PTP1B(1-321)	2	15	10	0.290533	0.00124142	3	1
2e	Amorphadiene	PTP1B(1-321)	2	50	10	0.2803	0.0104603	3	1
2e	Amorphadiene	PTP1B(1-321)	2	110	10	0.2162	0.00217332	3	1
2e	Amorphadiene	PTP1B(1-321)	5	0	10	0.425967	0.0094733	3	1
2e	Amorphadiene	PTP1B(1-321)	5	15	10	0.337267	0.00693357	3	1
2e	Amorphadiene	PTP1B(1-321)	5	50	10	0.2761	0.00905888	3	1
2e	Amorphadiene	PTP1B(1-321)	5	110	10	0.251667	0.0025458	3	1
2e	Amorphadiene	PTP1B(1-321)	10	0	10	0.45128	0.00503631	3	1
2e	Amorphadiene	PTP1B(1-321)	10	15	10	0.351533	0.00612898	3	1
2e	Amorphadiene	PTP1B(1-321)	10	50	10	0.311733	0.00284273	3	1
2e	Amorphadiene	PTP1B(1-321)	10	110	10	0.266967	0.00524161	3	1
2e	Amorphadiene	PTP1B(1-321)	15	0	10	0.456633	0.0185081	3	1
2e	Amorphadiene	PTP1B(1-321)	15	15	10	0.3888	0.0050659	3	1
2e	Amorphadiene	PTP1B(1-321)	15	50	10	0.314933	0.00988034	3	1
2e	Amorphadiene	PTP1B(1-321)	15	110	10	0.2591	0.00260832	3	1
2e	alpha bisabolene	PTP1B(1-321)	0	0	10	0	N/A	NM	NM
2e	alpha bisabolene	PTP1B(1-321)	0	0.9	10	0	N/A	NM	NM
2e	alpha bisabolene	PTP1B(1-321)	0	4.5	10	0	N/A	NM	NM
2e	alpha bisabolene	PTP1B(1-321)	0	11.25	10	0	N/A	NM	NM
2e	alpha bisabolene	PTP1B(1-321)	0.33	0	10	0.2771	0.000929157	3	1
2e	alpha bisabolene	PTP1B(1-321)	0.33	0.9	10	0.244633	0.00461603	3	1
2e	alpha bisabolene	PTP1B(1-321)	0.33	4.5	10	0.1926	0.00495681	3	1
2e	alpha bisabolene	PTP1B(1-321)	0.33	11.25	10	0.159933	0.0129708	3	1
2e	alpha bisabolene	PTP1B(1-321)	0.67	0	10	0.3093	0.0022942	3	1
2e	alpha bisabolene	PTP1B(1-321)	0.67	0.9	10	0.270433	0.00445172	3	1
2e	alpha bisabolene	PTP1B(1-321)	0.67	4.5	10	0.230067	0.00528089	3	1
2e	alpha bisabolene	PTP1B(1-321)	0.67	11.25	10	0.175867	0.00270637	3	1
2e	alpha bisabolene	PTP1B(1-321)	2	0	10	0.3861	0.00530031	3	1
2e	alpha bisabolene	PTP1B(1-321)	2	0.9	10	0.344067	0.00245244	3	1
2e	alpha bisabolene	PTP1B(1-321)	2	4.5	10	0.2641	0.00374477	3	1
2e	alpha bisabolene	PTP1B(1-321)	2	11.25	10	0.174967	0.00541428	3	1
2e	alpha bisabolene	PTP1B(1-321)	5	0	10	0.395433	0.00601618	3	1
2e	alpha bisabolene	PTP1B(1-321)	5	0.9	10	0.377133	0.000145297	3	1
2e	alpha bisabolene	PTP1B(1-321)	5	4.5	10	0.3036	0.00237557	3	1
2e	alpha bisabolene	PTP1B(1-321)	5	11.25	10	0.214933	0.0253694	3	1
2e	alpha bisabolene	PTP1B(1-321)	10	0	10	0.473467	0.00488205	3	1
2e	alpha bisabolene	PTP1B(1-321)	10	0.9	10	0.395333	0.00480706	3	1
2e	alpha bisabolene	PTP1B(1-321)	10	4.5	10	0.321333	0.00749941	3	1
2e	alpha bisabolene	PTP1B(1-321)	10	11.25	10	0.303533	0.00740818	3	1
2e	alpha bisabolene	PTP1B(1-321)	15	0	10	0.4808	0.00680221	3	1
2e	alpha bisabolene	PTP1B(1-321)	15	0.9	10	0.427	0.00168622	3	1
2e	alpha bisabolene	PTP1B(1-321)	15	4.5	10	0.341133	0.00745706	3	1
2e	alpha bisabolene	PTP1B(1-321)	15	11.25	10	0.298233	0.00453591	3	1
3e	(+)-1(10),4-cadinadiene	PTP1B(1-321)	0	0	10	0	N/A	NM	1
3e	(+)-1(10),4-cadinadiene	PTP1B(1-321)	0	20	10	0	N/A	NM	1
3e	(+)-1(10),4-cadinadiene	PTP1B(1-321)	0	100	10	0	N/A	NM	1
3e	(+)-1(10),4-cadinadiene	PTP1B(1-321)	0	200	10	0	N/A	NM	1
3e	(+)-1(10),4-cadinadiene	PTP1B(1-321)	0.33	0	10	0.219667	0.00881445	3	1
3e	(+)-1(10),4-cadinadiene	PTP1B(1-321)	0.33	20	10	0.191367	0.00705699	3	1
3e	(+)-1(10),4-cadinadiene	PTP1B(1-321)	0.33	100	10	0.1361	0.0058321	3	1
3e	(+)-1(10),4-cadinadiene	PTP1B(1-321)	0.33	200	10	0.153367	0.0111293	3	1
3e	(+)-1(10),4-cadinadiene	PTP1B(1-321)	0.67	0	10	0.2743	0.00289194	3	1
3e	(+)-1(10),4-cadinadiene	PTP1B(1-321)	0.67	20	10	0.225667	0.0011392	3	1
3e	(+)-1(10),4-cadinadiene	PTP1B(1-321)	0.67	100	10	0.161967	0.0105167	3	1
3e	(+)-1(10),4-cadinadiene	PTP1B(1-321)	0.67	200	10	0.1702	0.0106829	3	1
3e	(+)-1(10),4-cadinadiene	PTP1B(1-321)	2	0	10	0.3148	0.00480729	3	1
3e	(+)-1(10),4-cadinadiene	PTP1B(1-321)	2	20	10	0.245167	0.0275505	3	1
3e	(+)-1(10),4-cadinadiene	PTP1B(1-321)	2	100	10	0.231	0.00314802	3	1
3e	(+)-1(10),4-cadinadiene	PTP1B(1-321)	2	200	10	0.181767	0.00361586	3	1
3e	(+)-1(10),4-cadinadiene	PTP1B(1-321)	5	0	10	0.3801	0.0050856	3	1
3e	(+)-1(10),4-cadinadiene	PTP1B(1-321)	5	20	10	0.280133	0.00367393	3	1
3e	(+)-1(10),4-cadinadiene	PTP1B(1-321)	5	100	10	0.263467	0.0124367	3	1
3e	(+)-1(10),4-cadinadiene	PTP1B(1-321)	5	200	10	0.222533	0.00731422	3	1
3e	(+)-1(10),4-cadinadiene	PTP1B(1-321)	10	0	10	0.3806	0.00492375	3	1
3e	(+)-1(10),4-cadinadiene	PTP1B(1-321)	10	20	10	0.303533	0.00264092	3	1
3e	(+)-1(10),4-cadinadiene	PTP1B(1-321)	10	100	10	0.262267	0.0070881	3	1
3e	(+)-1(10),4-cadinadiene	PTP1B(1-321)	10	200	10	0.162833	0.0109658	3	1
3e	(+)-1(10),4-cadinadiene	PTP1B(1-321)	15	0	10	0.417	0.0155936	3	1
3e	(+)-1(10),4-cadinadiene	PTP1B(1-321)	15	20	10	0.312933	0.00253925	3	1
3e	(+)-1(10),4-cadinadiene	PTP1B(1-321)	15	100	10	0.265767	0.0089908	3	1
3e	(+)-1(10),4-cadinadiene	PTP1B(1-321)	15	200	10	0.170167	0.00333383	3	1
4e	Dihydroartimesinic acid	PTP1B(1-321)	0	0	10	0	N/A	NM	1
4e	Dihydroartimesinic acid	PTP1B(1-321)	0	200	10	0	N/A	NM	1
4e	Dihydroartimesinic acid	PTP1B(1-321)	0	300	10	0	N/A	NM	1
4e	Dihydroartimesinic acid	PTP1B(1-321)	0	400	10	0	N/A	NM	1
4e	Dihydroartimesinic acid	PTP1B(1-321)	0.33	0	10	0.286233	0.0140273	3	1
4e	Dihydroartimesinic acid	PTP1B(1-321)	0.33	200	10	0.189033	0.00430362	3	1
4e	Dihydroartimesinic acid	PTP1B(1-321)	0.33	300	10	0.150767	0.00808977	3	1
4e	Dihydroartimesinic acid	PTP1B(1-321)	0.33	400	10	0.1203	0.00422532	3	1
4e	Dihydroartimesinic acid	PTP1B(1-321)	0.67	0	10	0.339933	0.00445434	3	1
4e	Dihydroartimesinic acid	PTP1B(1-321)	0.67	200	10	0.2096	0.00383014	3	1
4e	Dihydroartimesinic acid	PTP1B(1-321)	0.67	300	10	0.1689	0.0103317	3	1
4e	Dihydroartimesinic acid	PTP1B(1-321)	0.67	400	10	0.158833	0.00600454	3	1
4e	Dihydroartimesinic acid	PTP1B(1-321)	2	0	10	0.4276	0.00601027	3	1
4e	Dihydroartimesinic acid	PTP1B(1-321)	2	200	10	0.252833	0.00361955	3	1
4e	Dihydroartimesinic acid	PTP1B(1-321)	2	300	10	0.248133	0.00497873	3	1
4e	Dihydroartimesinic acid	PTP1B(1-321)	2	400	10	0.1832	0.00480139	3	1
4e	Dihydroartimesinic acid	PTP1B(1-321)	5	0	10	0.480967	0.00266104	3	1
4e	Dihydroartimesinic acid	PTP1B(1-321)	5	200	10	0.2673	0.00453468	3	1
4e	Dihydroartimesinic acid	PTP1B(1-321)	5	300	10	0.266533	0.00275701	3	1
4e	Dihydroartimesinic acid	PTP1B(1-321)	5	400	10	0.2162	0.00362905	3	1
4e	Dihydroartimesinic acid	PTP1B(1-321)	10	0	10	0.515067	0.0117389	3	1
4e	Dihydroartimesinic acid	PTP1B(1-321)	10	200	10	0.362667	0.00758471	3	1
4e	Dihydroartimesinic acid	PTP1B(1-321)	10	300	10	0.2937	0.00581836	3	1
4e	Dihydroartimesinic acid	PTP1B(1-321)	10	400	10	0.244	0.0103838	3	1
4e	Dihydroartimesinic acid	PTP1B(1-321)	15	0	10	0.525233	0.0156053	3	1
4e	Dihydroartimesinic acid	PTP1B(1-321)	15	200	10	0.391267	0.0243524	3	1
4e	Dihydroartimesinic acid	PTP1B(1-321)	15	300	10	0.313733	0.00476142	3	1
4e	Dihydroartimesinic acid	PTP1B(1-321)	15	400	10	0.256567	0.00715177	3	1
S9d	Amorphadiene	PTP1B(1-321)	0	0	10	0	N/A	NM	NM
S9d	Amorphadiene	PTP1B(1-321)	0	15	10	0	N/A	NM	NM
S9d	Amorphadiene	PTP1B(1-321)	0	50	10	0	N/A	NM	NM
S9d	Amorphadiene	PTP1B(1-321)	0	110	10	0	N/A	NM	NM
S9d	Amorphadiene	PTP1B(1-321)	0.33	0	10	0.282333	N/A	3	1
S9d	Amorphadiene	PTP1B(1-321)	0.33	15	10	0.191967	0.00154955	3	1
S9d	Amorphadiene	PTP1B(1-321)	0.33	50	10	0.179767	0.00656768	3	1
S9d	Amorphadiene	PTP1B(1-321)	0.33	110	10	0.133633	0.00208833	3	1
S9d	Amorphadiene	PTP1B(1-321)	0.67	0	10	0.3177	0.0101974	3	1
S9d	Amorphadiene	PTP1B(1-321)	0.67	15	10	0.241967	0.00492172	3	1
S9d	Amorphadiene	PTP1B(1-321)	0.67	50	10	0.215167	0.00581502	3	1
S9d	Amorphadiene	PTP1B(1-321)	0.67	110	10	0.17138	0.00567049	3	1
S9d	Amorphadiene	PTP1B(1-321)	2	0	10	0.3947	0.00234977	3	1
S9d	Amorphadiene	PTP1B(1-321)	2	15	10	0.290533	0.00124142	3	1
S9d	Amorphadiene	PTP1B(1-321)	2	50	10	0.2803	0.0104603	3	1
S9d	Amorphadiene	PTP1B(1-321)	2	110	10	0.2162	0.00217332	3	1
S9d	Amorphadiene	PTP1B(1-321)	5	0	10	0.425967	0.0094733	3	1
S9d	Amorphadiene	PTP1B(1-321)	5	15	10	0.337267	0.00693357	3	1
S9d	Amorphadiene	PTP1B(1-321)	5	50	10	0.2761	0.00905888	3	1
S9d	Amorphadiene	PTP1B(1-321)	5	110	10	0.251667	0.0025458	3	1
S9d	Amorphadiene	PTP1B(1-321)	10	0	10	0.45128	0.00503631	3	1
S9d	Amorphadiene	PTP1B(1-321)	10	15	10	0.351533	0.00612898	3	1
S9d	Amorphadiene	PTP1B(1-321)	10	50	10	0.311733	0.00284273	3	1
S9d	Amorphadiene	PTP1B(1-321)	10	110	10	0.266967	0.00524161	3	1
S9d	Amorphadiene	PTP1B(1-321)	15	0	10	0.456633	0.0185081	3	1
S9d	Amorphadiene	PTP1B(1-321)	15	15	10	0.3888	0.0050659	3	1
S9d	Amorphadiene	PTP1B(1-321)	15	50	10	0.314933	0.00988034	3	1
S9d	Amorphadiene	PTP1B(1-321)	15	110	10	0.2591	0.00260832	3	1
S9e	Amorphadiene	TCPTP(1-317)	0	0	10	0	N/A	NM	NM
S9e	Amorphadiene	TCPTP(1-317)	0	50	10	0	N/A	NM	NM
S9e	Amorphadiene	TCPTP(1-317)	0	75	10	0	N/A	NM	NM
S9e	Amorphadiene	TCPTP(1-317)	0	100	10	0	N/A	NM	NM
S9e	Amorphadiene	TCPTP(1-317)	0.33	0	10	0.2352	0.0075699	3	1
S9e	Amorphadiene	TCPTP(1-317)	0.33	50	10	0.238967	0.00552942	3	1
S9e	Amorphadiene	TCPTP(1-317)	0.33	75	10	0.2218	0.00531131	3	1
S9e	Amorphadiene	TCPTP(1-317)	0.33	100	10	0.20555	0.00412785	6	1
S9e	Amorphadiene	TCPTP(1-317)	0.67	0	10	0.308967	0.0119536	3	1
S9e	Amorphadiene	TCPTP(1-317)	0.67	50	10	0.3036	0.00599083	3	1
S9e	Amorphadiene	TCPTP(1-317)	0.67	75	10	0.2794	0.000984886	3	1
S9e	Amorphadiene	TCPTP(1-317)	0.67	100	10	0.240583	0.00471554	6	1
S9e	Amorphadiene	TCPTP(1-317)	2	0	10	0.3828	0.0115889	3	1
S9e	Amorphadiene	TCPTP(1-317)	2	50	10	0.338733	0.00628473	3	1
S9e	Amorphadiene	TCPTP(1-317)	2	75	10	0.318033	0.00926667	3	1
S9e	Amorphadiene	TCPTP(1-317)	2	100	10	0.246633	0.00643613	6	1
S9e	Amorphadiene	TCPTP(1-317)	5	0	10	0.3904	0.00113725	3	1
S9e	Amorphadiene	TCPTP(1-317)	5	50	10	0.3836	0.00405257	3	1
S9e	Amorphadiene	TCPTP(1-317)	5	75	10	0.3341	0.00273922	3	1
S9e	Amorphadiene	TCPTP(1-317)	5	100	10	0.26325	0.0200784	6	1
S9e	Amorphadiene	TCPTP(1-317)	10	0	10	0.445033	0.0112333	3	1
S9e	Amorphadiene	TCPTP(1-317)	10	50	10	0.3958	0.00586202	3	1
S9e	Amorphadiene	TCPTP(1-317)	10	75	10	0.371567	0.00331378	3	1
S9e	Amorphadiene	TCPTP(1-317)	10	100	10	0.339733	0.00808602	6	1
S9e	Amorphadiene	TCPTP(1-317)	15	0	10	0.416833	0.00126667	3	1
S9e	Amorphadiene	TCPTP(1-317)	15	50	10	0.3834	0.00450037	3	1
S9e	Amorphadiene	TCPTP(1-317)	15	75	10	0.372267	0.00234687	3	1
S9e	Amorphadiene	TCPTP(1-317)	15	100	10	0.35455	0.0121202	6	1
S9f	Amorphadiene	PTP1B(1-281)	0	0	10	0	N/A	NM	NM
S9f	Amorphadiene	PTP1B(1-281)	0	10	10	0	N/A	NM	NM
S9f	Amorphadiene	PTP1B(1-281)	0	50	10	0	N/A	NM	NM
S9f	Amorphadiene	PTP1B(1-281)	0	100	10	0	N/A	NM	NM
S9f	Amorphadiene	PTP1B(1-281)	0.33	0	10	0.0915333	0.0014746	3	1
S9f	Amorphadiene	PTP1B(1-281)	0.33	10	10	0.0794667	0.00144952	3	1
S9f	Amorphadiene	PTP1B(1-281)	0.33	50	10	0.0724	0.00237978	3	1
S9f	Amorphadiene	PTP1B(1-281)	0.33	100	10	0.0688	0.00165025	3	1
S9f	Amorphadiene	PTP1B(1-281)	0.67	0	10	0.1181	0.00181751	3	1
S9f	Amorphadiene	PTP1B(1-281)	0.67	10	10	0.0944	0.00080829	3	1
S9f	Amorphadiene	PTP1B(1-281)	0.67	50	10	0.0935333	0.00368345	3	1
S9f	Amorphadiene	PTP1B(1-281)	0.67	100	10	0.0844333	0.0022762	3	1
S9f	Amorphadiene	PTP1B(1-281)	2	0	10	0.159267	0.00109138	3	1
S9f	Amorphadiene	PTP1B(1-281)	2	10	10	0.1419	0.00189033	3	1
S9f	Amorphadiene	PTP1B(1-281)	2	50	10	0.1286	0.000896289	3	1
S9f	Amorphadiene	PTP1B(1-281)	2	100	10	0.111767	0.00623761	3	1
S9f	Amorphadiene	PTP1B(1-281)	5	0	10	0.1989	0.00281839	3	1
S9f	Amorphadiene	PTP1B(1-281)	5	10	10	0.173433	0.000560753	3	1
S9f	Amorphadiene	PTP1B(1-281)	5	50	10	0.160433	0.00160243	3	1
S9f	Amorphadiene	PTP1B(1-281)	5	100	10	0.141367	0.00151694	3	1
S9f	Amorphadiene	PTP1B(1-281)	10	0	10	0.2283	0.0010583	3	1
S9f	Amorphadiene	PTP1B(1-281)	10	10	10	0.215167	0.00253925	3	1
S9f	Amorphadiene	PTP1B(1-281)	10	50	10	0.18505	0.00257434	6	1
S9f	Amorphadiene	PTP1B(1-281)	10	100	10	0.1601	0.00391067	3	1
S9f	Amorphadiene	PTP1B(1-281)	15	0	10	0.2494	0.00661891	3	1
S9f	Amorphadiene	PTP1B(1-281)	15	10	10	0.239433	0.006398	3	1
S9f	Amorphadiene	PTP1B(1-281)	15	50	10	0.20955	0.00123446	6	1
S9f	Amorphadiene	PTP1B(1-281)	15	100	10	0.194	0.00383536	3	1
S9g	Amorphadiene	TCPTP(1-281)	0	0	10	0	N/A	NM	NM
S9g	Amorphadiene	TCPTP(1-281)	0	20	10	0	N/A	NM	NM
S9g	Amorphadiene	TCPTP(1-281)	0	40	10	0	N/A	NM	NM
S9g	Amorphadiene	TCPTP(1-281)	0	100	10	0	N/A	NM	NM
S9g	Amorphadiene	TCPTP(1-281)	0.33	0	10	0.100767	0.00374893	3	1
S9g	Amorphadiene	TCPTP(1-281)	0.33	20	10	0.0936333	0.000290593	3	1
S9g	Amorphadiene	TCPTP(1-281)	0.33	40	10	0.0921	0.000986577	3	1
S9g	Amorphadiene	TCPTP(1-281)	0.33	100	10	0.0930333	0.000819214	3	1
S9g	Amorphadiene	TCPTP(1-281)	0.67	0	10	0.120133	0.000808977	3	1
S9g	Amorphadiene	TCPTP(1-281)	0.67	20	10	0.111933	0.00186756	3	1
S9g	Amorphadiene	TCPTP(1-281)	0.67	40	10	0.1063	0.00184481	3	1
S9g	Amorphadiene	TCPTP(1-281)	0.67	100	10	0.101833	0.000779601	3	1
S9g	Amorphadiene	TCPTP(1-281)	2	0	10	0.1313	0.00102144	3	1
S9g	Amorphadiene	TCPTP(1-281)	2	20	10	0.124467	0.00112002	3	1
S9g	Amorphadiene	TCPTP(1-281)	2	40	10	0.120433	0.00133708	3	1
S9g	Amorphadiene	TCPTP(1-281)	2	100	10	0.1169	0.000971253	3	1
S9g	Amorphadiene	TCPTP(1-281)	5	0	10	0.1443	0.00306431	3	1
S9g	Amorphadiene	TCPTP(1-281)	5	20	10	0.144033	0.00182787	3	1
S9g	Amorphadiene	TCPTP(1-281)	5	40	10	0.131833	0.00386192	3	1
S9g	Amorphadiene	TCPTP(1-281)	5	100	10	0.1273	0.00194679	3	1
S9g	Amorphadiene	TCPTP(1-281)	10	0	10	0.174033	0.00336865	3	1
S9g	Amorphadiene	TCPTP(1-281)	10	20	10	0.163867	0.0031887	3	1
S9g	Amorphadiene	TCPTP(1-281)	10	40	10	0.147267	0.00309426	3	1
S9g	Amorphadiene	TCPTP(1-281)	10	100	10	0.1352	0.000416333	3	1
S9g	Amorphadiene	TCPTP(1-281)	15	0	10	0.1735	0.0002	3	1
S9g	Amorphadiene	TCPTP(1-281)	15	20	10	0.168933	0.00228059	3	1
S9g	Amorphadiene	TCPTP(1-281)	15	40	10	0.154633	0.00147686	3	1
S9g	Amorphadiene	TCPTP(1-281)	15	100	10	0.1465	0.00492443	3	1
S9h	alpha bisabolene	PTP1B(1-321)	0	0	10	0	N/A	NM	NM
S9h	alpha bisabolene	PTP1B(1-321)	0	0.9	10	0	N/A	NM	NM
S9h	alpha bisabolene	PTP1B(1-321)	0	4.5	10	0	N/A	NM	NM
S9h	alpha bisabolene	PTP1B(1-321)	0	11.25	10	0	N/A	NM	NM
S9h	alpha bisabolene	PTP1B(1-321)	0.33	0	10	0.2771	0.000929157	3	1
S9h	alpha bisabolene	PTP1B(1-321)	0.33	0.9	10	0.244633	0.00461603	3	1
S9h	alpha bisabolene	PTP1B(1-321)	0.33	4.5	10	0.1926	0.00495681	3	1
S9h	alpha bisabolene	PTP1B(1-321)	0.33	11.25	10	0.159933	0.0129708	3	1
S9h	alpha bisabolene	PTP1B(1-321)	0.67	0	10	0.3093	0.0022942	3	1
S9h	alpha bisabolene	PTP1B(1-321)	0.67	0.9	10	0.270433	0.00445172	3	1
S9h	alpha bisabolene	PTP1B(1-321)	0.67	4.5	10	0.230067	0.00528089	3	1
S9h	alpha bisabolene	PTP1B(1-321)	0.67	11.25	10	0.175867	0.00270637	3	1
S9h	alpha bisabolene	PTP1B(1-321)	2	0	10	0.3861	0.00530031	3	1
S9h	alpha bisabolene	PTP1B(1-321)	2	0.9	10	0.344067	0.00245244	3	1
S9h	alpha bisabolene	PTP1B(1-321)	2	4.5	10	0.2641	0.00374477	3	1
S9h	alpha bisabolene	PTP1B(1-321)	2	11.25	10	0.174967	0.00541428	3	1
S9h	alpha bisabolene	PTP1B(1-321)	5	0	10	0.395433	0.00601618	3	1
S9h	alpha bisabolene	PTP1B(1-321)	5	0.9	10	0.377133	0.000145297	3	1
S9h	alpha bisabolene	PTP1B(1-321)	5	4.5	10	0.3036	0.00237557	3	1
S9h	alpha bisabolene	PTP1B(1-321)	5	11.25	10	0.214933	0.0253694	3	1
S9h	alpha bisabolene	PTP1B(1-321)	10	0	10	0.473467	0.00488205	3	1
S9h	alpha bisabolene	PTP1B(1-321)	10	0.9	10	0.395333	0.00480706	3	1
S9h	alpha bisabolene	PTP1B(1-321)	10	4.5	10	0.321333	0.00749941	3	1
S9h	alpha bisabolene	PTP1B(1-321)	10	11.25	10	0.303533	0.00740818	3	1
S9h	alpha bisabolene	PTP1B(1-321)	15	0	10	0.4808	0.00680221	3	1
S9h	alpha bisabolene	PTP1B(1-321)	15	0.9	10	0.427	0.00168622	3	1
S9h	alpha bisabolene	PTP1B(1-321)	15	4.5	10	0.341133	0.00745706	3	1
S9h	alpha bisabolene	PTP1B(1-321)	15	11.25	10	0.298233	0.00453591	3	1
S9i	alpha bisabolene	TCPTP(1-317)	0	0	10	0	N/A	NM	1
S9i	alpha bisabolene	TCPTP(1-317)	0	4.5	10	0	N/A	NM	1
S9i	alpha bisabolene	TCPTP(1-317)	0	9	10	0	N/A	NM	1
S9i	alpha bisabolene	TCPTP(1-317)	0	22.5	10	0	N/A	NM	1
S9i	alpha bisabolene	TCPTP(1-317)	0.33	0	10	0.298367	0.000926163	3	1
S9i	alpha bisabolene	TCPTP(1-317)	0.33	4.5	10	0.268933	0.00702622	3	1
S9i	alpha bisabolene	TCPTP(1-317)	0.33	9	10	0.2435	0.00257099	3	1
S9i	alpha bisabolene	TCPTP(1-317)	0.33	22.5	10	0.242533	0.00793732	3	2
S9i	alpha bisabolene	TCPTP(1-317)	0.67	0	10	0.3071	0.00438786	3	1
S9i	alpha bisabolene	TCPTP(1-317)	0.67	4.5	10	0.305533	0.0031328	3	1
S9i	alpha bisabolene	TCPTP(1-317)	0.67	9	10	0.256533	0.00461892	3	1
S9i	alpha bisabolene	TCPTP(1-317)	0.67	22.5	10	0.260267	0.00469089	5	1
S9i	alpha bisabolene	TCPTP(1-317)	2	0	10	0.346433	0.0032199	3	1
S9i	alpha bisabolene	TCPTP(1-317)	2	4.5	10	0.3388	0.00591946	3	1
S9i	alpha bisabolene	TCPTP(1-317)	2	9	10	0.319367	0.00609718	6	1
S9i	alpha bisabolene	TCPTP(1-317)	2	22.5	10	0.308067	0.00481745	3	1
S9i	alpha bisabolene	TCPTP(1-317)	5	0	10	0.3892	0.0132493	3	1
S9i	alpha bisabolene	TCPTP(1-317)	5	4.5	10	0.404333	0.00201025	3	1
S9i	alpha bisabolene	TCPTP(1-317)	5	9	10	0.361533	0.00270257	6	1
S9i	alpha bisabolene	TCPTP(1-317)	5	22.5	10	0.307133	0.00512065	3	1
S9i	alpha bisabolene	TCPTP(1-317)	10	0	10	0.439333	0.000935117	3	1
S9i	alpha bisabolene	TCPTP(1-317)	10	4.5	10	0.359267	0.00316245	3	1
S9i	alpha bisabolene	TCPTP(1-317)	10	9	10	0.3822	0.0108088	3	2
S9i	alpha bisabolene	TCPTP(1-317)	10	22.5	10	0.3289	0.00155671	3	1
S9i	alpha bisabolene	TCPTP(1-317)	15	0	10	0.452867	0.00906446	3	1
S9i	alpha bisabolene	TCPTP(1-317)	15	4.5	10	0.3683	5.7735e-05	3	1
S9i	alpha bisabolene	TCPTP(1-317)	15	9	10	0.374533	0.0158552	3	1
S9i	alpha bisabolene	TCPTP(1-317)	15	22.5	10	0.334633	0.00563747	3	1
S9j	alpha bisabolene	PTP1B(1-281)	0	0	10	0	N/A	NM	1
S9j	alpha bisabolene	PTP1B(1-281)	0	4.5	10	0	N/A	NM	1
S9j	alpha bisabolene	PTP1B(1-281)	0	9	10	0	N/A	NM	1
S9j	alpha bisabolene	PTP1B(1-281)	0	22.5	10	0	N/A	NM	1
S9j	alpha bisabolene	PTP1B(1-281)	0.33	0	10	0.0922	5.7735e-05	3	1
S9j	alpha bisabolene	PTP1B(1-281)	0.33	4.5	10	0.0788333	0.000617342	3	1
S9j	alpha bisabolene	PTP1B(1-281)	0.33	9	10	0.0699333	0.00192729	3	1
S9j	alpha bisabolene	PTP1B(1-281)	0.33	22.5	10	0.0692667	0.00608422	3	1
S9j	alpha bisabolene	PTP1B(1-281)	0.67	0	10	0.110967	0.000966667	3	1
S9j	alpha bisabolene	PTP1B(1-281)	0.67	4.5	10	0.0959667	0.00168556	3	1
S9j	alpha bisabolene	PTP1B(1-281)	0.67	9	10	0.0836	0.00043589	3	1
S9j	alpha bisabolene	PTP1B(1-281)	0.67	22.5	10	0.0803667	0.00386279	3	1
S9j	alpha bisabolene	PTP1B(1-281)	2	0	10	0.130767	0.00163333	3	1
S9j	alpha bisabolene	PTP1B(1-281)	2	4.5	10	0.107567	0.00177983	3	1
S9j	alpha bisabolene	PTP1B(1-281)	2	9	10	0.1062	0.00204042	3	1
S9j	alpha bisabolene	PTP1B(1-281)	2	22.5	10	0.0892333	0.00108372	3	1
S9j	alpha bisabolene	PTP1B(1-281)	5	0	10	0.159433	0.00277869	3	1
S9j	alpha bisabolene	PTP1B(1-281)	5	4.5	10	0.137	0.00309246	3	1
S9j	alpha bisabolene	PTP1B(1-281)	5	9	10	0.1303	0.0028931	3	1
S9j	alpha bisabolene	PTP1B(1-281)	5	22.5	10	0.118533	0.00358019	3	1
S9j	alpha bisabolene	PTP1B(1-281)	10	0	10	0.201267	0.0012441	3	1
S9j	alpha bisabolene	PTP1B(1-281)	10	4.5	10	0.166833	0.00202841	3	1
S9j	alpha bisabolene	PTP1B(1-281)	10	9	10	0.151267	0.00356293	3	1
S9j	alpha bisabolene	PTP1B(1-281)	10	22.5	10	0.140967	0.00192729	3	1
S9j	alpha bisabolene	PTP1B(1-281)	15	0	10	0.212467	0.0027552	3	1
S9j	alpha bisabolene	PTP1B(1-281)	15	4.5	10	0.180733	0.000876229	3	1
S9j	alpha bisabolene	PTP1B(1-281)	15	9	10	0.1695	0.003177	3	1
S9j	alpha bisabolene	PTP1B(1-281)	15	22.5	10	0.1629	0.00155349	3	1
S9k	alpha bisabolene	TCPTP(1-281)	0	0	10	0	N/A	NM	1
S9k	alpha bisabolene	TCPTP(1-281)	0	4.5	10	0	N/A	NM	1
S9k	alpha bisabolene	TCPTP(1-281)	0	9	10	0	N/A	NM	1
S9k	alpha bisabolene	TCPTP(1-281)	0	22.5	10	0	N/A	NM	1
S9k	alpha bisabolene	TCPTP(1-281)	0.33	0	10	0.0873667	0.00194022	3	1
S9k	alpha bisabolene	TCPTP(1-281)	0.33	4.5	10	0.0825667	0.000669162	3	1
S9k	alpha bisabolene	TCPTP(1-281)	0.33	9	10	0.0749333	0.00354087	3	1
S9k	alpha bisabolene	TCPTP(1-281)	0.33	22.5	10	0.0860667	0.00202183	3	1
S9k	alpha bisabolene	TCPTP(1-281)	0.67	0	10	0.1014	0.00101489	3	1
S9k	alpha bisabolene	TCPTP(1-281)	0.67	4.5	10	0.100133	0.00163843	3	1
S9k	alpha bisabolene	TCPTP(1-281)	0.67	9	10	0.0839333	0.00235112	3	1
S9k	alpha bisabolene	TCPTP(1-281)	0.67	22.5	10	0.0999333	0.00271559	3	1
S9k	alpha bisabolene	TCPTP(1-281)	2	0	10	0.116333	0.00140515	3	1
S9k	alpha bisabolene	TCPTP(1-281)	2	4.5	10	0.123667	0.00213255	3	1
S9k	alpha bisabolene	TCPTP(1-281)	2	9	10	0.111867	0.00223632	3	1
S9k	alpha bisabolene	TCPTP(1-281)	2	22.5	10	0.115467	0.00305305	3	1
S9k	alpha bisabolene	TCPTP(1-281)	5	0	10	0.1304	0.00223681	3	1
S9k	alpha bisabolene	TCPTP(1-281)	5	4.5	10	0.136233	0.00116667	3	1
S9k	alpha bisabolene	TCPTP(1-281)	5	9	10	0.1265	0.00107858	3	1
S9k	alpha bisabolene	TCPTP(1-281)	5	22.5	10	0.117633	0.00153225	3	1
S9k	alpha bisabolene	TCPTP(1-281)	10	0	10	0.15	0.00147422	3	1
S9k	alpha bisabolene	TCPTP(1-281)	10	4.5	10	0.145433	0.00261683	3	1
S9k	alpha bisabolene	TCPTP(1-281)	10	9	10	0.1357	0.00179258	3	1
S9k	alpha bisabolene	TCPTP(1-281)	10	22.5	10	0.132	0.0014	3	1
S9k	alpha bisabolene	TCPTP(1-281)	15	0	10	0.1576	0.001	3	1
S9k	alpha bisabolene	TCPTP(1-281)	15	4.5	10	0.149767	0.00322714	3	1
S9k	alpha bisabolene	TCPTP(1-281)	15	9	10	0.145733	0.00341435	3	1
S9k	alpha bisabolene	TCPTP(1-281)	15	22.5	10	0.1323	0.00023094	3	1
S9l	Dihydroartimesinic acid	PTP1B(1-321)	0	0	10	0	N/A	NM	1
S9l	Dihydroartimesinic acid	PTP1B(1-321)	0	200	10	0	N/A	NM	1
S9l	Dihydroartimesinic acid	PTP1B(1-321)	0	300	10	0	N/A	NM	1
S9l	Dihydroartimesinic acid	PTP1B(1-321)	0	400	10	0	N/A	NM	1
S9l	Dihydroartimesinic acid	PTP1B(1-321)	0.33	0	10	0.286233	0.0140273	3	1
S9l	Dihydroartimesinic acid	PTP1B(1-321)	0.33	200	10	0.189033	0.00430362	3	1
S9l	Dihydroartimesinic acid	PTP1B(1-321)	0.33	300	10	0.150767	0.00808977	3	1
S9l	Dihydroartimesinic acid	PTP1B(1-321)	0.33	400	10	0.1203	0.00422532	3	1
S9l	Dihydroartimesinic acid	PTP1B(1-321)	0.67	0	10	0.339933	0.00445434	3	1
S9l	Dihydroartimesinic acid	PTP1B(1-321)	0.67	200	10	0.2096	0.00383014	3	1
S9l	Dihydroartimesinic acid	PTP1B(1-321)	0.67	300	10	0.1689	0.0103317	3	1
S9l	Dihydroartimesinic acid	PTP1B(1-321)	0.67	400	10	0.158833	0.00600454	3	1
S9l	Dihydroartimesinic acid	PTP1B(1-321)	2	0	10	0.4276	0.00601027	3	1
S9l	Dihydroartimesinic acid	PTP1B(1-321)	2	200	10	0.252833	0.00361955	3	1
S9l	Dihydroartimesinic acid	PTP1B(1-321)	2	300	10	0.248133	0.00497873	3	1
S9l	Dihydroartimesinic acid	PTP1B(1-321)	2	400	10	0.1832	0.00480139	3	1
S9l	Dihydroartimesinic acid	PTP1B(1-321)	5	0	10	0.480967	0.00266104	3	1
S9l	Dihydroartimesinic acid	PTP1B(1-321)	5	200	10	0.2673	0.00453468	3	1
S9l	Dihydroartimesinic acid	PTP1B(1-321)	5	300	10	0.266533	0.00275701	3	1
S9l	Dihydroartimesinic acid	PTP1B(1-321)	5	400	10	0.2162	0.00362905	3	1
S9l	Dihydroartimesinic acid	PTP1B(1-321)	10	0	10	0.515067	0.0117389	3	1
S9l	Dihydroartimesinic acid	PTP1B(1-321)	10	200	10	0.362667	0.00758471	3	1
S9l	Dihydroartimesinic acid	PTP1B(1-321)	10	300	10	0.2937	0.00581836	3	1
S9l	Dihydroartimesinic acid	PTP1B(1-321)	10	400	10	0.244	0.0103838	3	1
S9l	Dihydroartimesinic acid	PTP1B(1-321)	15	0	10	0.525233	0.0156053	3	1
S9l	Dihydroartimesinic acid	PTP1B(1-321)	15	200	10	0.391267	0.0243524	3	1
S9l	Dihydroartimesinic acid	PTP1B(1-321)	15	300	10	0.313733	0.00476142	3	1
S9l	Dihydroartimesinic acid	PTP1B(1-321)	15	400	10	0.256567	0.00715177	3	1
S9m	alpha bisabolol	PTP1B(1-321)	0	0	10	0	N/A	NM	1
S9m	alpha bisabolol	PTP1B(1-321)	0	20	10	0	N/A	NM	1
S9m	alpha bisabolol	PTP1B(1-321)	0	60	10	0	N/A	NM	1
S9m	alpha bisabolol	PTP1B(1-321)	0	100	10	0	N/A	NM	1
S9m	alpha bisabolol	PTP1B(1-321)	0.33	0	10	0.259833	0.000290593	3	1
S9m	alpha bisabolol	PTP1B(1-321)	0.33	20	10	0.285233	0.0128215	3	1
S9m	alpha bisabolol	PTP1B(1-321)	0.33	60	10	0.2533	0.00515008	3	1
S9m	alpha bisabolol	PTP1B(1-321)	0.33	100	10	0.243333	0.00936026	3	1
S9m	alpha bisabolol	PTP1B(1-321)	0.67	0	10	0.307667	0.00709139	3	1
S9m	alpha bisabolol	PTP1B(1-321)	0.67	20	10	0.3243	0.00470319	3	1
S9m	alpha bisabolol	PTP1B(1-321)	0.67	60	10	0.294267	0.00647671	3	1
S9m	alpha bisabolol	PTP1B(1-321)	0.67	100	10	0.2847	0.00638514	3	1
S9m	alpha bisabolol	PTP1B(1-321)	2	0	10	0.371	0.00414287	3	1
S9m	alpha bisabolol	PTP1B(1-321)	2	20	10	0.3591	0.00291376	3	1
S9m	alpha bisabolol	PTP1B(1-321)	2	60	10	0.356267	0.003408	3	1
S9m	alpha bisabolol	PTP1B(1-321)	2	100	10	0.286333	0.00724461	3	1
S9m	alpha bisabolol	PTP1B(1-321)	5	0	10	0.412133	0.0134997	3	1
S9m	alpha bisabolol	PTP1B(1-321)	5	20	10	0.416	0.0122111	3	1
S9m	alpha bisabolol	PTP1B(1-321)	5	60	10	0.3739	0.00360185	3	1
S9m	alpha bisabolol	PTP1B(1-321)	5	100	10	0.333167	0.00155063	3	1
S9m	alpha bisabolol	PTP1B(1-321)	10	0	10	0.448	0.00221209	3	1
S9m	alpha bisabolol	PTP1B(1-321)	10	20	10	0.427267	0.0127469	3	1
S9m	alpha bisabolol	PTP1B(1-321)	10	60	10	0.3908	0.0169521	3	1
S9m	alpha bisabolol	PTP1B(1-321)	10	100	10	0.3598	0.00597578	3	1
S9m	alpha bisabolol	PTP1B(1-321)	15	0	10	0.468867	0.00415625	3	1
S9m	alpha bisabolol	PTP1B(1-321)	15	20	10	0.441967	0.0038602	3	1
S9m	alpha bisabolol	PTP1B(1-321)	15	60	10	0.429633	0.026441	3	1
S9m	alpha bisabolol	PTP1B(1-321)	15	100	10	0.382067	0.00514987	3	1
*NM: Given the lack of detectable rates for low-substrate, high-inhibitor conditions, we did not measure rates when substrate was absent. These points were treated as 0 in model fitting.
