# Supplementary material for: Microbially guided discovery and biosynthesis of biologically active natural products
Source: Research Square preprint supplement (doi:10.21203/rs.3.rs-92116/v1), 2020-10-20
Supplement: Supplementary file 3 [file 782c370ac5f0498dc5b208c9.xlsx]

## Sheet: Sheet1
Experiment	Strain	[Spectinomycin] - liquid	[Spectinomycin] - agar	Biological replicates*	Experimental sets**
Figure	Name (cell line:plasmids)	ug\mL	ug\mL	#	#
1e	s1030: F-plasmid, pB2Hopt	0	0	2	1
1e	s1030: F-plasmid, pB2Hopt.mut	0	0	2	1
1e	s1030: F-plasmid, pB2Hopt	0	100	2	1
1e	s1030: F-plasmid, pB2Hopt.mut	0	100	2	1
1e	s1030: F-plasmid, pB2Hopt	0	150	2	1
1e	s1030: F-plasmid, pB2Hopt.mut	0	150	2	1
1e	s1030: F-plasmid, pB2Hopt	0	200	2	1
1e	s1030: F-plasmid, pB2Hopt.mut	0	200	2	1
1e	s1030: F-plasmid, pB2Hopt	0	250	2	1
1e	s1030: F-plasmid, pB2Hopt.mut	0	250	2	1
1e	s1030: F-plasmid, pB2Hopt	0	300	2	1
1e	s1030: F-plasmid, pB2Hopt.mut	0	300	2	1
1e	s1030: F-plasmid, pB2Hopt	0	350	2	1
1e	s1030: F-plasmid, pB2Hopt.mut	0	350	2	1
1e	s1030: F-plasmid, pB2Hopt	0	400	2	1
1e	s1030: F-plasmid, pB2Hopt.mut	0	400	2	1
1e	s1030: F-plasmid, pB2Hopt	0	450	2	1
1e	s1030: F-plasmid, pB2Hopt.mut	0	450	2	1
1e	s1030: F-plasmid, pB2Hopt	0	500	2	1
1e	s1030: F-plasmid, pB2Hopt.mut	0	500	2	1
S2	s1030: F-plasmid, pB2Hopt	0	0	2	1
S2	s1030: F-plasmid, pB2Hopt.mut	0	0	2	1
S2	s1030: F-plasmid, pB2Hopt	0	100	2	1
S2	s1030: F-plasmid, pB2Hopt.mut	0	100	2	1
S2	s1030: F-plasmid, pB2Hopt	0	150	2	1
S2	s1030: F-plasmid, pB2Hopt.mut	0	150	2	1
S2	s1030: F-plasmid, pB2Hopt	0	200	2	1
S2	s1030: F-plasmid, pB2Hopt.mut	0	200	2	1
S2	s1030: F-plasmid, pB2Hopt	0	250	2	1
S2	s1030: F-plasmid, pB2Hopt.mut	0	250	2	1
S2	s1030: F-plasmid, pB2Hopt	0	300	2	1
S2	s1030: F-plasmid, pB2Hopt.mut	0	300	2	1
S2	s1030: F-plasmid, pB2Hopt	0	350	2	1
S2	s1030: F-plasmid, pB2Hopt.mut	0	350	2	1
S2	s1030: F-plasmid, pB2Hopt	0	400	2	1
S2	s1030: F-plasmid, pB2Hopt.mut	0	400	2	1
S2	s1030: F-plasmid, pB2Hopt	0	450	2	1
S2	s1030: F-plasmid, pB2Hopt.mut	0	450	2	1
S2	s1030: F-plasmid, pB2Hopt	0	500	2	1
S2	s1030: F-plasmid, pB2Hopt.mut	0	500	2	1
S2	s1030: F-plasmid, pB2Hopt	100	0	2	1
S2	s1030: F-plasmid, pB2Hopt.mut	100	0	2	1
S2	s1030: F-plasmid, pB2Hopt	100	100	2	1
S2	s1030: F-plasmid, pB2Hopt.mut	100	100	2	1
S2	s1030: F-plasmid, pB2Hopt	100	150	2	1
S2	s1030: F-plasmid, pB2Hopt.mut	100	150	2	1
S2	s1030: F-plasmid, pB2Hopt	100	200	2	1
S2	s1030: F-plasmid, pB2Hopt.mut	100	200	2	1
S2	s1030: F-plasmid, pB2Hopt	100	250	2	1
S2	s1030: F-plasmid, pB2Hopt.mut	100	250	2	1
S2	s1030: F-plasmid, pB2Hopt	100	300	2	1
S2	s1030: F-plasmid, pB2Hopt.mut	100	300	2	1
S2	s1030: F-plasmid, pB2Hopt	100	350	2	1
S2	s1030: F-plasmid, pB2Hopt.mut	100	350	2	1
S2	s1030: F-plasmid, pB2Hopt	100	400	2	1
S2	s1030: F-plasmid, pB2Hopt.mut	100	400	2	1
S2	s1030: F-plasmid, pB2Hopt	100	450	2	1
S2	s1030: F-plasmid, pB2Hopt.mut	100	450	2	1
S2	s1030: F-plasmid, pB2Hopt	100	500	2	1
S2	s1030: F-plasmid, pB2Hopt.mut	100	500	2	1
S2	s1030: F-plasmid, pB2Hopt	200	0	2	1
S2	s1030: F-plasmid, pB2Hopt.mut	200	0	2	1
S2	s1030: F-plasmid, pB2Hopt	200	100	2	1
S2	s1030: F-plasmid, pB2Hopt.mut	200	100	2	1
S2	s1030: F-plasmid, pB2Hopt	200	150	2	1
S2	s1030: F-plasmid, pB2Hopt.mut	200	150	2	1
S2	s1030: F-plasmid, pB2Hopt	200	200	2	1
S2	s1030: F-plasmid, pB2Hopt.mut	200	200	2	1
S2	s1030: F-plasmid, pB2Hopt	200	250	2	1
S2	s1030: F-plasmid, pB2Hopt.mut	200	250	2	1
S2	s1030: F-plasmid, pB2Hopt	200	300	2	1
S2	s1030: F-plasmid, pB2Hopt.mut	200	300	2	1
S2	s1030: F-plasmid, pB2Hopt	200	350	2	1
S2	s1030: F-plasmid, pB2Hopt.mut	200	350	2	1
S2	s1030: F-plasmid, pB2Hopt	200	400	2	1
S2	s1030: F-plasmid, pB2Hopt.mut	200	400	2	1
S2	s1030: F-plasmid, pB2Hopt	200	450	2	1
S2	s1030: F-plasmid, pB2Hopt.mut	200	450	2	1
S2	s1030: F-plasmid, pB2Hopt	200	500	2	1
S2	s1030: F-plasmid, pB2Hopt.mut	200	500	2	1
S2	s1030: F-plasmid, pB2Hopt	300	0	2	1
S2	s1030: F-plasmid, pB2Hopt.mut	300	0	2	1
S2	s1030: F-plasmid, pB2Hopt	300	100	2	1
S2	s1030: F-plasmid, pB2Hopt.mut	300	100	2	1
S2	s1030: F-plasmid, pB2Hopt	300	150	2	1
S2	s1030: F-plasmid, pB2Hopt.mut	300	150	2	1
S2	s1030: F-plasmid, pB2Hopt	300	200	2	1
S2	s1030: F-plasmid, pB2Hopt.mut	300	200	2	1
S2	s1030: F-plasmid, pB2Hopt	300	250	2	1
S2	s1030: F-plasmid, pB2Hopt.mut	300	250	2	1
S2	s1030: F-plasmid, pB2Hopt	300	300	2	1
S2	s1030: F-plasmid, pB2Hopt.mut	300	300	2	1
S2	s1030: F-plasmid, pB2Hopt	300	350	2	1
S2	s1030: F-plasmid, pB2Hopt.mut	300	350	2	1
S2	s1030: F-plasmid, pB2Hopt	300	400	2	1
S2	s1030: F-plasmid, pB2Hopt.mut	300	400	2	1
S2	s1030: F-plasmid, pB2Hopt	300	450	2	1
S2	s1030: F-plasmid, pB2Hopt.mut	300	450	2	1
S2	s1030: F-plasmid, pB2Hopt	300	500	2	1
S2	s1030: F-plasmid, pB2Hopt.mut	300	500	2	1
S2	s1030: F-plasmid, pB2Hopt	400	0	2	1
S2	s1030: F-plasmid, pB2Hopt.mut	400	0	2	1
S2	s1030: F-plasmid, pB2Hopt	400	100	2	1
S2	s1030: F-plasmid, pB2Hopt.mut	400	100	2	1
S2	s1030: F-plasmid, pB2Hopt	400	150	2	1
S2	s1030: F-plasmid, pB2Hopt.mut	400	150	2	1
S2	s1030: F-plasmid, pB2Hopt	400	200	2	1
S2	s1030: F-plasmid, pB2Hopt.mut	400	200	2	1
S2	s1030: F-plasmid, pB2Hopt	400	250	2	1
S2	s1030: F-plasmid, pB2Hopt.mut	400	250	2	1
S2	s1030: F-plasmid, pB2Hopt	400	300	2	1
S2	s1030: F-plasmid, pB2Hopt.mut	400	300	2	1
S2	s1030: F-plasmid, pB2Hopt	400	350	2	1
S2	s1030: F-plasmid, pB2Hopt.mut	400	350	2	1
S2	s1030: F-plasmid, pB2Hopt	400	400	2	1
S2	s1030: F-plasmid, pB2Hopt.mut	400	400	2	1
S2	s1030: F-plasmid, pB2Hopt	400	450	2	1
S2	s1030: F-plasmid, pB2Hopt.mut	400	450	2	1
S2	s1030: F-plasmid, pB2Hopt	400	500	2	1
S2	s1030: F-plasmid, pB2Hopt.mut	400	500	2	1
S2	s1030: F-plasmid, pB2Hopt	500	0	2	1
S2	s1030: F-plasmid, pB2Hopt.mut	500	0	2	1
S2	s1030: F-plasmid, pB2Hopt	500	100	2	1
S2	s1030: F-plasmid, pB2Hopt.mut	500	100	2	1
S2	s1030: F-plasmid, pB2Hopt	500	150	2	1
S2	s1030: F-plasmid, pB2Hopt.mut	500	150	2	1
S2	s1030: F-plasmid, pB2Hopt	500	200	2	1
S2	s1030: F-plasmid, pB2Hopt.mut	500	200	2	1
S2	s1030: F-plasmid, pB2Hopt	500	250	2	1
S2	s1030: F-plasmid, pB2Hopt.mut	500	250	2	1
S2	s1030: F-plasmid, pB2Hopt	500	300	2	1
S2	s1030: F-plasmid, pB2Hopt.mut	500	300	2	1
S2	s1030: F-plasmid, pB2Hopt	500	350	2	1
S2	s1030: F-plasmid, pB2Hopt.mut	500	350	2	1
S2	s1030: F-plasmid, pB2Hopt	500	400	2	1
S2	s1030: F-plasmid, pB2Hopt.mut	500	400	2	1
S2	s1030: F-plasmid, pB2Hopt	500	450	2	1
S2	s1030: F-plasmid, pB2Hopt.mut	500	450	2	1
S2	s1030: F-plasmid, pB2Hopt	500	500	2	1
S2	s1030: F-plasmid, pB2Hopt.mut	500	500	2	1
S2	s1030: F-plasmid, pB2Hs2RBS30	0	0	2	1
S2	s1030: F-plasmid, pB2Hs2RBS30.mut	0	0	2	1
S2	s1030: F-plasmid, pB2Hs2RBS30	0	100	2	1
S2	s1030: F-plasmid, pB2Hs2RBS30.mut	0	100	2	1
S2	s1030: F-plasmid, pB2Hs2RBS30	0	150	2	1
S2	s1030: F-plasmid, pB2Hs2RBS30.mut	0	150	2	1
S2	s1030: F-plasmid, pB2Hs2RBS30	0	200	2	1
S2	s1030: F-plasmid, pB2Hs2RBS30.mut	0	200	2	1
S2	s1030: F-plasmid, pB2Hs2RBS30	0	250	2	1
S2	s1030: F-plasmid, pB2Hs2RBS30.mut	0	250	2	1
S2	s1030: F-plasmid, pB2Hs2RBS30	0	300	2	1
S2	s1030: F-plasmid, pB2Hs2RBS30.mut	0	300	2	1
S2	s1030: F-plasmid, pB2Hs2RBS30	0	350	2	1
S2	s1030: F-plasmid, pB2Hs2RBS30.mut	0	350	2	1
S2	s1030: F-plasmid, pB2Hs2RBS30	0	400	2	1
S2	s1030: F-plasmid, pB2Hs2RBS30.mut	0	400	2	1
S2	s1030: F-plasmid, pB2Hs2RBS30	0	450	2	1
S2	s1030: F-plasmid, pB2Hs2RBS30.mut	0	450	2	1
S2	s1030: F-plasmid, pB2Hs2RBS30	0	500	2	1
S2	s1030: F-plasmid, pB2Hs2RBS30.mut	0	500	2	1
S2	s1030: F-plasmid, pB2Hs2RBS30	100	0	2	1
S2	s1030: F-plasmid, pB2Hs2RBS30.mut	100	0	2	1
S2	s1030: F-plasmid, pB2Hs2RBS30	100	100	2	1
S2	s1030: F-plasmid, pB2Hs2RBS30.mut	100	100	2	1
S2	s1030: F-plasmid, pB2Hs2RBS30	100	150	2	1
S2	s1030: F-plasmid, pB2Hs2RBS30.mut	100	150	2	1
S2	s1030: F-plasmid, pB2Hs2RBS30	100	200	2	1
S2	s1030: F-plasmid, pB2Hs2RBS30.mut	100	200	2	1
S2	s1030: F-plasmid, pB2Hs2RBS30	100	250	2	1
S2	s1030: F-plasmid, pB2Hs2RBS30.mut	100	250	2	1
S2	s1030: F-plasmid, pB2Hs2RBS30	100	300	2	1
S2	s1030: F-plasmid, pB2Hs2RBS30.mut	100	300	2	1
S2	s1030: F-plasmid, pB2Hs2RBS30	100	350	2	1
S2	s1030: F-plasmid, pB2Hs2RBS30.mut	100	350	2	1
S2	s1030: F-plasmid, pB2Hs2RBS30	100	400	2	1
S2	s1030: F-plasmid, pB2Hs2RBS30.mut	100	400	2	1
S2	s1030: F-plasmid, pB2Hs2RBS30	100	450	2	1
S2	s1030: F-plasmid, pB2Hs2RBS30.mut	100	450	2	1
S2	s1030: F-plasmid, pB2Hs2RBS30	100	500	2	1
S2	s1030: F-plasmid, pB2Hs2RBS30.mut	100	500	2	1
S2	s1030: F-plasmid, pB2Hs2RBS30	200	0	2	1
S2	s1030: F-plasmid, pB2Hs2RBS30.mut	200	0	2	1
S2	s1030: F-plasmid, pB2Hs2RBS30	200	100	2	1
S2	s1030: F-plasmid, pB2Hs2RBS30.mut	200	100	2	1
S2	s1030: F-plasmid, pB2Hs2RBS30	200	150	2	1
S2	s1030: F-plasmid, pB2Hs2RBS30.mut	200	150	2	1
S2	s1030: F-plasmid, pB2Hs2RBS30	200	200	2	1
S2	s1030: F-plasmid, pB2Hs2RBS30.mut	200	200	2	1
S2	s1030: F-plasmid, pB2Hs2RBS30	200	250	2	1
S2	s1030: F-plasmid, pB2Hs2RBS30.mut	200	250	2	1
S2	s1030: F-plasmid, pB2Hs2RBS30	200	300	2	1
S2	s1030: F-plasmid, pB2Hs2RBS30.mut	200	300	2	1
S2	s1030: F-plasmid, pB2Hs2RBS30	200	350	2	1
S2	s1030: F-plasmid, pB2Hs2RBS30.mut	200	350	2	1
S2	s1030: F-plasmid, pB2Hs2RBS30	200	400	2	1
S2	s1030: F-plasmid, pB2Hs2RBS30.mut	200	400	2	1
S2	s1030: F-plasmid, pB2Hs2RBS30	200	450	2	1
S2	s1030: F-plasmid, pB2Hs2RBS30.mut	200	450	2	1
S2	s1030: F-plasmid, pB2Hs2RBS30	200	500	2	1
S2	s1030: F-plasmid, pB2Hs2RBS30.mut	200	500	2	1
S2	s1030: F-plasmid, pB2Hs2RBS30	300	0	2	1
S2	s1030: F-plasmid, pB2Hs2RBS30.mut	300	0	2	1
S2	s1030: F-plasmid, pB2Hs2RBS30	300	100	2	1
S2	s1030: F-plasmid, pB2Hs2RBS30.mut	300	100	2	1
S2	s1030: F-plasmid, pB2Hs2RBS30	300	150	2	1
S2	s1030: F-plasmid, pB2Hs2RBS30.mut	300	150	2	1
S2	s1030: F-plasmid, pB2Hs2RBS30	300	200	2	1
S2	s1030: F-plasmid, pB2Hs2RBS30.mut	300	200	2	1
S2	s1030: F-plasmid, pB2Hs2RBS30	300	250	2	1
S2	s1030: F-plasmid, pB2Hs2RBS30.mut	300	250	2	1
S2	s1030: F-plasmid, pB2Hs2RBS30	300	300	2	1
S2	s1030: F-plasmid, pB2Hs2RBS30.mut	300	300	2	1
S2	s1030: F-plasmid, pB2Hs2RBS30	300	350	2	1
S2	s1030: F-plasmid, pB2Hs2RBS30.mut	300	350	2	1
S2	s1030: F-plasmid, pB2Hs2RBS30	300	400	2	1
S2	s1030: F-plasmid, pB2Hs2RBS30.mut	300	400	2	1
S2	s1030: F-plasmid, pB2Hs2RBS30	300	450	2	1
S2	s1030: F-plasmid, pB2Hs2RBS30.mut	300	450	2	1
S2	s1030: F-plasmid, pB2Hs2RBS30	300	500	2	1
S2	s1030: F-plasmid, pB2Hs2RBS30.mut	300	500	2	1
S2	s1030: F-plasmid, pB2Hs2RBS30	400	0	2	1
S2	s1030: F-plasmid, pB2Hs2RBS30.mut	400	0	2	1
S2	s1030: F-plasmid, pB2Hs2RBS30	400	100	2	1
S2	s1030: F-plasmid, pB2Hs2RBS30.mut	400	100	2	1
S2	s1030: F-plasmid, pB2Hs2RBS30	400	150	2	1
S2	s1030: F-plasmid, pB2Hs2RBS30.mut	400	150	2	1
S2	s1030: F-plasmid, pB2Hs2RBS30	400	200	2	1
S2	s1030: F-plasmid, pB2Hs2RBS30.mut	400	200	2	1
S2	s1030: F-plasmid, pB2Hs2RBS30	400	250	2	1
S2	s1030: F-plasmid, pB2Hs2RBS30.mut	400	250	2	1
S2	s1030: F-plasmid, pB2Hs2RBS30	400	300	2	1
S2	s1030: F-plasmid, pB2Hs2RBS30.mut	400	300	2	1
S2	s1030: F-plasmid, pB2Hs2RBS30	400	350	2	1
S2	s1030: F-plasmid, pB2Hs2RBS30.mut	400	350	2	1
S2	s1030: F-plasmid, pB2Hs2RBS30	400	400	2	1
S2	s1030: F-plasmid, pB2Hs2RBS30.mut	400	400	2	1
S2	s1030: F-plasmid, pB2Hs2RBS30	400	450	2	1
S2	s1030: F-plasmid, pB2Hs2RBS30.mut	400	450	2	1
S2	s1030: F-plasmid, pB2Hs2RBS30	400	500	2	1
S2	s1030: F-plasmid, pB2Hs2RBS30.mut	400	500	2	1
S2	s1030: F-plasmid, pB2Hs2RBS30	500	0	2	1
S2	s1030: F-plasmid, pB2Hs2RBS30.mut	500	0	2	1
S2	s1030: F-plasmid, pB2Hs2RBS30	500	100	2	1
S2	s1030: F-plasmid, pB2Hs2RBS30.mut	500	100	2	1
S2	s1030: F-plasmid, pB2Hs2RBS30	500	150	2	1
S2	s1030: F-plasmid, pB2Hs2RBS30.mut	500	150	2	1
S2	s1030: F-plasmid, pB2Hs2RBS30	500	200	2	1
S2	s1030: F-plasmid, pB2Hs2RBS30.mut	500	200	2	1
S2	s1030: F-plasmid, pB2Hs2RBS30	500	250	2	1
S2	s1030: F-plasmid, pB2Hs2RBS30.mut	500	250	2	1
S2	s1030: F-plasmid, pB2Hs2RBS30	500	300	2	1
S2	s1030: F-plasmid, pB2Hs2RBS30.mut	500	300	2	1
S2	s1030: F-plasmid, pB2Hs2RBS30	500	350	2	1
S2	s1030: F-plasmid, pB2Hs2RBS30.mut	500	350	2	1
S2	s1030: F-plasmid, pB2Hs2RBS30	500	400	2	1
S2	s1030: F-plasmid, pB2Hs2RBS30.mut	500	400	2	1
S2	s1030: F-plasmid, pB2Hs2RBS30	500	450	2	1
S2	s1030: F-plasmid, pB2Hs2RBS30.mut	500	450	2	1
S2	s1030: F-plasmid, pB2Hs2RBS30	500	500	2	1
S2	s1030: F-plasmid, pB2Hs2RBS30.mut	500	500	2	1
2c	s1030: F-plasmid, pMBIScmr, pTSabs, pB2Hopt	0	0	4	2
2c	s1030: F-plasmid, pMBIScmr, pTSabs, pB2Hopt.mut	0	0	4	2
2c	s1030: F-plasmid, pMBIScmr, pTSabs(D404A/D621A), pB2Hopt.mut	0	0	4	2
2c	s1030: F-plasmid, pMBIScmr, pTSads, pB2Hopt	0	0	4	2
2c	s1030: F-plasmid, pMBIScmr, pTSghs, pB2Hopt	0	0	4	2
2c	s1030: F-plasmid, pMBIScmr, pTStxs, pB2Hopt	0	0	4	2
2c	s1030: F-plasmid, pMBIScmr, pTSaba, pB2Hopt	0	0	2	1
2c	s1030: F-plasmid, pMBIScmr, pTSabs, pB2Hopt	0	200	4	2
2c	s1030: F-plasmid, pMBIScmr, pTSabs, pB2Hopt.mut	0	200	4	2
2c	s1030: F-plasmid, pMBIScmr, pTSabs(D404A/D621A), pB2Hopt.mut	0	200	4	2
2c	s1030: F-plasmid, pMBIScmr, pTSads, pB2Hopt	0	200	4	2
2c	s1030: F-plasmid, pMBIScmr, pTSghs, pB2Hopt	0	200	4	2
2c	s1030: F-plasmid, pMBIScmr, pTStxs, pB2Hopt	0	200	4	2
2c	s1030: F-plasmid, pMBIScmr, pTSaba, pB2Hopt	0	200	2	1
2c	s1030: F-plasmid, pMBIScmr, pTSabs, pB2Hopt	0	400	4	2
2c	s1030: F-plasmid, pMBIScmr, pTSabs, pB2Hopt.mut	0	400	4	2
2c	s1030: F-plasmid, pMBIScmr, pTSabs(D404A/D621A), pB2Hopt.mut	0	400	4	2
2c	s1030: F-plasmid, pMBIScmr, pTSads, pB2Hopt	0	400	4	2
2c	s1030: F-plasmid, pMBIScmr, pTSghs, pB2Hopt	0	400	4	2
2c	s1030: F-plasmid, pMBIScmr, pTStxs, pB2Hopt	0	400	4	2
2c	s1030: F-plasmid, pMBIScmr, pTSaba, pB2Hopt	0	400	2	1
2c	s1030: F-plasmid, pMBIScmr, pTSabs, pB2Hopt	0	500	4	2
2c	s1030: F-plasmid, pMBIScmr, pTSabs, pB2Hopt.mut	0	500	4	2
2c	s1030: F-plasmid, pMBIScmr, pTSabs(D404A/D621A), pB2Hopt.mut	0	500	4	2
2c	s1030: F-plasmid, pMBIScmr, pTSads, pB2Hopt	0	500	4	2
2c	s1030: F-plasmid, pMBIScmr, pTSghs, pB2Hopt	0	500	4	2
2c	s1030: F-plasmid, pMBIScmr, pTStxs, pB2Hopt	0	500	4	2
2c	s1030: F-plasmid, pMBIScmr, pTSaba, pB2Hopt	0	500	2	1
S3d	s1030: F-plasmid, pMBIScmr, pTSghs(d343a), pB2Hopt	0	0	2	1
S3d	s1030: F-plasmid, pMBIScmr, pTSghs, pB2Hopt	0	0	2	1
S3d	s1030: F-plasmid, pMBIScmr, pTSads, pB2Hopt*	0	0	2	1
S3d	s1030: F-plasmid, pMBIScmr, pTSads(d299a), pB2Hoptx	0	0	2	1
S3d	s1030: F-plasmid, pMBIScmr, pTSads, pB2Hoptx	0	0	2	1
S3d	s1030: F-plasmid, pMBIScmr, pTSads(d299a), pB2Hopt	0	0	2	1
S3d	s1030: F-plasmid, pMBIScmr, pTSads, pB2Hopt	0	0	2	1
S3d	s1030: F-plasmid, pMBIScmr, pTSaba, pB2Hoptx	0	0	2	1
S3d	s1030: F-plasmid, pMBIScmr, pTSaba(D566A), pB2Hopt	0	0	2	1
S3d	s1030: F-plasmid, pMBIScmr, pTSaba, pB2Hopt	0	0	2	1
S3d	s1030: F-plasmid, pMBIScmr, pTSghs(d343a), pB2Hopt	0	200	2	1
S3d	s1030: F-plasmid, pMBIScmr, pTSghs, pB2Hopt	0	200	2	1
S3d	s1030: F-plasmid, pMBIScmr, pTSads, pB2Hopt*	0	200	2	1
S3d	s1030: F-plasmid, pMBIScmr, pTSads(d299a), pB2Hoptx	0	200	2	1
S3d	s1030: F-plasmid, pMBIScmr, pTSads, pB2Hoptx	0	200	2	1
S3d	s1030: F-plasmid, pMBIScmr, pTSads(d299a), pB2Hopt	0	200	2	1
S3d	s1030: F-plasmid, pMBIScmr, pTSads, pB2Hopt	0	200	2	1
S3d	s1030: F-plasmid, pMBIScmr, pTSaba, pB2Hoptx	0	200	2	1
S3d	s1030: F-plasmid, pMBIScmr, pTSaba(D566A), pB2Hopt	0	200	2	1
S3d	s1030: F-plasmid, pMBIScmr, pTSaba, pB2Hopt	0	200	2	1
S3d	s1030: F-plasmid, pMBIScmr, pTSghs(d343a), pB2Hopt	0	400	2	1
S3d	s1030: F-plasmid, pMBIScmr, pTSghs, pB2Hopt	0	400	2	1
S3d	s1030: F-plasmid, pMBIScmr, pTSads, pB2Hopt*	0	400	2	1
S3d	s1030: F-plasmid, pMBIScmr, pTSads(d299a), pB2Hoptx	0	400	2	1
S3d	s1030: F-plasmid, pMBIScmr, pTSads, pB2Hoptx	0	400	2	1
S3d	s1030: F-plasmid, pMBIScmr, pTSads(d299a), pB2Hopt	0	400	2	1
S3d	s1030: F-plasmid, pMBIScmr, pTSads, pB2Hopt	0	400	2	1
S3d	s1030: F-plasmid, pMBIScmr, pTSaba, pB2Hoptx	0	400	2	1
S3d	s1030: F-plasmid, pMBIScmr, pTSaba(D566A), pB2Hopt	0	400	2	1
S3d	s1030: F-plasmid, pMBIScmr, pTSaba, pB2Hopt	0	400	2	1
S3d	s1030: F-plasmid, pMBIScmr, pTSghs(d343a), pB2Hopt	0	600	2	1
S3d	s1030: F-plasmid, pMBIScmr, pTSghs, pB2Hopt	0	600	2	1
S3d	s1030: F-plasmid, pMBIScmr, pTSads, pB2Hopt*	0	600	2	1
S3d	s1030: F-plasmid, pMBIScmr, pTSads(d299a), pB2Hoptx	0	600	2	1
S3d	s1030: F-plasmid, pMBIScmr, pTSads, pB2Hoptx	0	600	2	1
S3d	s1030: F-plasmid, pMBIScmr, pTSads(d299a), pB2Hopt	0	600	2	1
S3d	s1030: F-plasmid, pMBIScmr, pTSads, pB2Hopt	0	600	2	1
S3d	s1030: F-plasmid, pMBIScmr, pTSaba, pB2Hoptx	0	600	2	1
S3d	s1030: F-plasmid, pMBIScmr, pTSaba(D566A), pB2Hopt	0	600	2	1
S3d	s1030: F-plasmid, pMBIScmr, pTSaba, pB2Hopt	0	600	2	1
S3d	s1030: F-plasmid, pMBIScmr, pTSghs(d343a), pB2Hopt	0	800	2	1
S3d	s1030: F-plasmid, pMBIScmr, pTSghs, pB2Hopt	0	800	2	1
S3d	s1030: F-plasmid, pMBIScmr, pTSads, pB2Hopt*	0	800	2	1
S3d	s1030: F-plasmid, pMBIScmr, pTSads(d299a), pB2Hoptx	0	800	2	1
S3d	s1030: F-plasmid, pMBIScmr, pTSads, pB2Hoptx	0	800	2	1
S3d	s1030: F-plasmid, pMBIScmr, pTSads(d299a), pB2Hopt	0	800	2	1
S3d	s1030: F-plasmid, pMBIScmr, pTSads, pB2Hopt	0	800	2	1
S3d	s1030: F-plasmid, pMBIScmr, pTSaba, pB2Hoptx	0	800	2	1
S3d	s1030: F-plasmid, pMBIScmr, pTSaba(D566A), pB2Hopt	0	800	2	1
S3d	s1030: F-plasmid, pMBIScmr, pTSaba, pB2Hopt	0	800	2	1
3b	s1030: F-plasmid, pMBIScmr, pTSS9Q22,pB2Hopt	0	0	2	1
3b	s1030: F-plasmid, pMBIScmr, pTSA0A067L3D3,pB2Hopt	0	0	2	1
3b	s1030: F-plasmid, pMBIScmr, pTSA0A1I1AC30,pB2Hopt	0	0	2	1
3b	s1030: F-plasmid, pMBIScmr, pTSA0A0D9ZGD1,pB2Hopt	0	0	2	1
3b	s1030: F-plasmid, pMBIScmr, pTSA0A0D3D8G7,pB2Hopt	0	0	2	1
3b	s1030: F-plasmid, pMBIScmr, pTSA0A0K9RZT8,pB2Hopt	0	0	2	1
3b	s1030: F-plasmid, pMBIScmr, pTSA2XI80,pB2Hopt	0	0	2	1
3b	s1030: F-plasmid, pMBIScmr, pTSF2DRF1,pB2Hopt	0	0	2	1
3b	s1030: F-plasmid, pMBIScmr, pTSA0A0D2L718,pB2Hopt	0	0	2	1
3b	s1030: F-plasmid, pMBIScmr, pTSA0A0D9X487,pB2Hopt	0	0	2	1
3b	s1030: F-plasmid, pMBIScmr, pTSA0A022S1C8,pB2Hopt	0	0	2	1
3b	s1030: F-plasmid, pMBIScmr, pTSA0A0C2TFL3,pB2Hopt	0	0	2	1
3b	s1030: F-plasmid, pMBIScmr, pTSA0A1S3XW43,pB2Hopt	0	0	2	1
3b	s1030: F-plasmid, pMBIScmr, pTSG2QRS0,pB2Hopt	0	0	2	1
3b	s1030: F-plasmid, pMBIScmr, pTSA0A0287XU99,pB2Hopt	0	0	2	1
3b	s1030: F-plasmid, pMBIScmr, pTSA0A078IZJ5,pB2Hopt	0	0	2	1
3b	s1030: F-plasmid, pMBIScmr, pTSG4TNA6,pB2Hopt	0	0	2	1
3b	s1030: F-plasmid, pMBIScmr, pTST1LTV1,pB2Hopt	0	0	2	1
3b	s1030: F-plasmid, pMBIScmr, pTSB9IF04,pB2Hopt	0	0	2	1
3b	s1030: F-plasmid, pMBIScmr, pTSA0A0G2ZSL3,pB2Hopt	0	0	2	1
3b	s1030: F-plasmid, pMBIScmr, pTSA0A0C9VSL7,pB2Hopt	0	0	2	1
3b	s1030: F-plasmid, pMBIScmr, pTSA0A1L7WMZ8,pB2Hopt	0	0	2	1
3b	s1030: F-plasmid, pMBIScmr, pTSA0A166A5J3,pB2Hopt	0	0	2	1
3b	s1030: F-plasmid, pMBIScmr, pTSA0A2H3DKU3,pB2Hopt	0	0	2	1
3b	s1030: F-plasmid, pMBIScmr, pTSS9Q22,pB2Hopt	0	200	2	1
3b	s1030: F-plasmid, pMBIScmr, pTSA0A067L3D3,pB2Hopt	0	200	2	1
3b	s1030: F-plasmid, pMBIScmr, pTSA0A1I1AC30,pB2Hopt	0	200	2	1
3b	s1030: F-plasmid, pMBIScmr, pTSA0A0D9ZGD1,pB2Hopt	0	200	2	1
3b	s1030: F-plasmid, pMBIScmr, pTSA0A0D3D8G7,pB2Hopt	0	200	2	1
3b	s1030: F-plasmid, pMBIScmr, pTSA0A0K9RZT8,pB2Hopt	0	200	2	1
3b	s1030: F-plasmid, pMBIScmr, pTSA2XI80,pB2Hopt	0	200	2	1
3b	s1030: F-plasmid, pMBIScmr, pTSF2DRF1,pB2Hopt	0	200	2	1
3b	s1030: F-plasmid, pMBIScmr, pTSA0A0D2L718,pB2Hopt	0	200	2	1
3b	s1030: F-plasmid, pMBIScmr, pTSA0A0D9X487,pB2Hopt	0	200	2	1
3b	s1030: F-plasmid, pMBIScmr, pTSA0A022S1C8,pB2Hopt	0	200	2	1
3b	s1030: F-plasmid, pMBIScmr, pTSA0A0C2TFL3,pB2Hopt	0	200	2	1
3b	s1030: F-plasmid, pMBIScmr, pTSA0A1S3XW43,pB2Hopt	0	200	2	1
3b	s1030: F-plasmid, pMBIScmr, pTSG2QRS0,pB2Hopt	0	200	2	1
3b	s1030: F-plasmid, pMBIScmr, pTSA0A0287XU99,pB2Hopt	0	200	2	1
3b	s1030: F-plasmid, pMBIScmr, pTSA0A078IZJ5,pB2Hopt	0	200	2	1
3b	s1030: F-plasmid, pMBIScmr, pTSG4TNA6,pB2Hopt	0	200	2	1
3b	s1030: F-plasmid, pMBIScmr, pTST1LTV1,pB2Hopt	0	200	2	1
3b	s1030: F-plasmid, pMBIScmr, pTSB9IF04,pB2Hopt	0	200	2	1
3b	s1030: F-plasmid, pMBIScmr, pTSA0A0G2ZSL3,pB2Hopt	0	200	2	1
3b	s1030: F-plasmid, pMBIScmr, pTSA0A0C9VSL7,pB2Hopt	0	200	2	1
3b	s1030: F-plasmid, pMBIScmr, pTSA0A1L7WMZ8,pB2Hopt	0	200	2	1
3b	s1030: F-plasmid, pMBIScmr, pTSA0A166A5J3,pB2Hopt	0	200	2	1
3b	s1030: F-plasmid, pMBIScmr, pTSA0A2H3DKU3,pB2Hopt	0	200	2	1
3b	s1030: F-plasmid, pMBIScmr, pTSS9Q22,pB2Hopt	0	300	2	1
3b	s1030: F-plasmid, pMBIScmr, pTSA0A067L3D3,pB2Hopt	0	300	2	1
3b	s1030: F-plasmid, pMBIScmr, pTSA0A1I1AC30,pB2Hopt	0	300	2	1
3b	s1030: F-plasmid, pMBIScmr, pTSA0A0D9ZGD1,pB2Hopt	0	300	2	1
3b	s1030: F-plasmid, pMBIScmr, pTSA0A0D3D8G7,pB2Hopt	0	300	2	1
3b	s1030: F-plasmid, pMBIScmr, pTSA0A0K9RZT8,pB2Hopt	0	300	2	1
3b	s1030: F-plasmid, pMBIScmr, pTSA2XI80,pB2Hopt	0	300	2	1
3b	s1030: F-plasmid, pMBIScmr, pTSF2DRF1,pB2Hopt	0	300	2	1
3b	s1030: F-plasmid, pMBIScmr, pTSA0A0D2L718,pB2Hopt	0	300	2	1
3b	s1030: F-plasmid, pMBIScmr, pTSA0A0D9X487,pB2Hopt	0	300	2	1
3b	s1030: F-plasmid, pMBIScmr, pTSA0A022S1C8,pB2Hopt	0	300	2	1
3b	s1030: F-plasmid, pMBIScmr, pTSA0A0C2TFL3,pB2Hopt	0	300	2	1
3b	s1030: F-plasmid, pMBIScmr, pTSA0A1S3XW43,pB2Hopt	0	300	2	1
3b	s1030: F-plasmid, pMBIScmr, pTSG2QRS0,pB2Hopt	0	300	2	1
3b	s1030: F-plasmid, pMBIScmr, pTSA0A0287XU99,pB2Hopt	0	300	2	1
3b	s1030: F-plasmid, pMBIScmr, pTSA0A078IZJ5,pB2Hopt	0	300	2	1
3b	s1030: F-plasmid, pMBIScmr, pTSG4TNA6,pB2Hopt	0	300	2	1
3b	s1030: F-plasmid, pMBIScmr, pTST1LTV1,pB2Hopt	0	300	2	1
3b	s1030: F-plasmid, pMBIScmr, pTSB9IF04,pB2Hopt	0	300	2	1
3b	s1030: F-plasmid, pMBIScmr, pTSA0A0G2ZSL3,pB2Hopt	0	300	2	1
3b	s1030: F-plasmid, pMBIScmr, pTSA0A0C9VSL7,pB2Hopt	0	300	2	1
3b	s1030: F-plasmid, pMBIScmr, pTSA0A1L7WMZ8,pB2Hopt	0	300	2	1
3b	s1030: F-plasmid, pMBIScmr, pTSA0A166A5J3,pB2Hopt	0	300	2	1
3b	s1030: F-plasmid, pMBIScmr, pTSA0A2H3DKU3,pB2Hopt	0	300	2	1
3b	s1030: F-plasmid, pMBIScmr, pTSS9Q22,pB2Hopt	0	400	2	1
3b	s1030: F-plasmid, pMBIScmr, pTSA0A067L3D3,pB2Hopt	0	400	2	1
3b	s1030: F-plasmid, pMBIScmr, pTSA0A1I1AC30,pB2Hopt	0	400	2	1
3b	s1030: F-plasmid, pMBIScmr, pTSA0A0D9ZGD1,pB2Hopt	0	400	2	1
3b	s1030: F-plasmid, pMBIScmr, pTSA0A0D3D8G7,pB2Hopt	0	400	2	1
3b	s1030: F-plasmid, pMBIScmr, pTSA0A0K9RZT8,pB2Hopt	0	400	2	1
3b	s1030: F-plasmid, pMBIScmr, pTSA2XI80,pB2Hopt	0	400	2	1
3b	s1030: F-plasmid, pMBIScmr, pTSF2DRF1,pB2Hopt	0	400	2	1
3b	s1030: F-plasmid, pMBIScmr, pTSA0A0D2L718,pB2Hopt	0	400	2	1
3b	s1030: F-plasmid, pMBIScmr, pTSA0A0D9X487,pB2Hopt	0	400	2	1
3b	s1030: F-plasmid, pMBIScmr, pTSA0A022S1C8,pB2Hopt	0	400	2	1
3b	s1030: F-plasmid, pMBIScmr, pTSA0A0C2TFL3,pB2Hopt	0	400	2	1
3b	s1030: F-plasmid, pMBIScmr, pTSA0A1S3XW43,pB2Hopt	0	400	2	1
3b	s1030: F-plasmid, pMBIScmr, pTSG2QRS0,pB2Hopt	0	400	2	1
3b	s1030: F-plasmid, pMBIScmr, pTSA0A0287XU99,pB2Hopt	0	400	2	1
3b	s1030: F-plasmid, pMBIScmr, pTSA0A078IZJ5,pB2Hopt	0	400	2	1
3b	s1030: F-plasmid, pMBIScmr, pTSG4TNA6,pB2Hopt	0	400	2	1
3b	s1030: F-plasmid, pMBIScmr, pTST1LTV1,pB2Hopt	0	400	2	1
3b	s1030: F-plasmid, pMBIScmr, pTSB9IF04,pB2Hopt	0	400	2	1
3b	s1030: F-plasmid, pMBIScmr, pTSA0A0G2ZSL3,pB2Hopt	0	400	2	1
3b	s1030: F-plasmid, pMBIScmr, pTSA0A0C9VSL7,pB2Hopt	0	400	2	1
3b	s1030: F-plasmid, pMBIScmr, pTSA0A1L7WMZ8,pB2Hopt	0	400	2	1
3b	s1030: F-plasmid, pMBIScmr, pTSA0A166A5J3,pB2Hopt	0	400	2	1
3b	s1030: F-plasmid, pMBIScmr, pTSA0A2H3DKU3,pB2Hopt	0	400	2	1
3b	s1030: F-plasmid, pMBIScmr, pTSS9Q22,pB2Hopt	0	500	2	1
3b	s1030: F-plasmid, pMBIScmr, pTSA0A067L3D3,pB2Hopt	0	500	2	1
3b	s1030: F-plasmid, pMBIScmr, pTSA0A1I1AC30,pB2Hopt	0	500	2	1
3b	s1030: F-plasmid, pMBIScmr, pTSA0A0D9ZGD1,pB2Hopt	0	500	2	1
3b	s1030: F-plasmid, pMBIScmr, pTSA0A0D3D8G7,pB2Hopt	0	500	2	1
3b	s1030: F-plasmid, pMBIScmr, pTSA0A0K9RZT8,pB2Hopt	0	500	2	1
3b	s1030: F-plasmid, pMBIScmr, pTSA2XI80,pB2Hopt	0	500	2	1
3b	s1030: F-plasmid, pMBIScmr, pTSF2DRF1,pB2Hopt	0	500	2	1
3b	s1030: F-plasmid, pMBIScmr, pTSA0A0D2L718,pB2Hopt	0	500	2	1
3b	s1030: F-plasmid, pMBIScmr, pTSA0A0D9X487,pB2Hopt	0	500	2	1
3b	s1030: F-plasmid, pMBIScmr, pTSA0A022S1C8,pB2Hopt	0	500	2	1
3b	s1030: F-plasmid, pMBIScmr, pTSA0A0C2TFL3,pB2Hopt	0	500	2	1
3b	s1030: F-plasmid, pMBIScmr, pTSA0A1S3XW43,pB2Hopt	0	500	2	1
3b	s1030: F-plasmid, pMBIScmr, pTSG2QRS0,pB2Hopt	0	500	2	1
3b	s1030: F-plasmid, pMBIScmr, pTSA0A0287XU99,pB2Hopt	0	500	2	1
3b	s1030: F-plasmid, pMBIScmr, pTSA0A078IZJ5,pB2Hopt	0	500	2	1
3b	s1030: F-plasmid, pMBIScmr, pTSG4TNA6,pB2Hopt	0	500	2	1
3b	s1030: F-plasmid, pMBIScmr, pTST1LTV1,pB2Hopt	0	500	2	1
3b	s1030: F-plasmid, pMBIScmr, pTSB9IF04,pB2Hopt	0	500	2	1
3b	s1030: F-plasmid, pMBIScmr, pTSA0A0G2ZSL3,pB2Hopt	0	500	2	1
3b	s1030: F-plasmid, pMBIScmr, pTSA0A0C9VSL7,pB2Hopt	0	500	2	1
3b	s1030: F-plasmid, pMBIScmr, pTSA0A1L7WMZ8,pB2Hopt	0	500	2	1
3b	s1030: F-plasmid, pMBIScmr, pTSA0A166A5J3,pB2Hopt	0	500	2	1
3b	s1030: F-plasmid, pMBIScmr, pTSA0A2H3DKU3,pB2Hopt	0	500	2	1
3b	s1030: F-plasmid, pMBIScmr, pTSS9Q22,pB2Hopt	0	600	2	1
3b	s1030: F-plasmid, pMBIScmr, pTSA0A067L3D3,pB2Hopt	0	600	2	1
3b	s1030: F-plasmid, pMBIScmr, pTSA0A1I1AC30,pB2Hopt	0	600	2	1
3b	s1030: F-plasmid, pMBIScmr, pTSA0A0D9ZGD1,pB2Hopt	0	600	2	1
3b	s1030: F-plasmid, pMBIScmr, pTSA0A0D3D8G7,pB2Hopt	0	600	2	1
3b	s1030: F-plasmid, pMBIScmr, pTSA0A0K9RZT8,pB2Hopt	0	600	2	1
3b	s1030: F-plasmid, pMBIScmr, pTSA2XI80,pB2Hopt	0	600	2	1
3b	s1030: F-plasmid, pMBIScmr, pTSF2DRF1,pB2Hopt	0	600	2	1
3b	s1030: F-plasmid, pMBIScmr, pTSA0A0D2L718,pB2Hopt	0	600	2	1
3b	s1030: F-plasmid, pMBIScmr, pTSA0A0D9X487,pB2Hopt	0	600	2	1
3b	s1030: F-plasmid, pMBIScmr, pTSA0A022S1C8,pB2Hopt	0	600	2	1
3b	s1030: F-plasmid, pMBIScmr, pTSA0A0C2TFL3,pB2Hopt	0	600	2	1
3b	s1030: F-plasmid, pMBIScmr, pTSA0A1S3XW43,pB2Hopt	0	600	2	1
3b	s1030: F-plasmid, pMBIScmr, pTSG2QRS0,pB2Hopt	0	600	2	1
3b	s1030: F-plasmid, pMBIScmr, pTSA0A0287XU99,pB2Hopt	0	600	2	1
3b	s1030: F-plasmid, pMBIScmr, pTSA0A078IZJ5,pB2Hopt	0	600	2	1
3b	s1030: F-plasmid, pMBIScmr, pTSG4TNA6,pB2Hopt	0	600	2	1
3b	s1030: F-plasmid, pMBIScmr, pTST1LTV1,pB2Hopt	0	600	2	1
3b	s1030: F-plasmid, pMBIScmr, pTSB9IF04,pB2Hopt	0	600	2	1
3b	s1030: F-plasmid, pMBIScmr, pTSA0A0G2ZSL3,pB2Hopt	0	600	2	1
3b	s1030: F-plasmid, pMBIScmr, pTSA0A0C9VSL7,pB2Hopt	0	600	2	1
3b	s1030: F-plasmid, pMBIScmr, pTSA0A1L7WMZ8,pB2Hopt	0	600	2	1
3b	s1030: F-plasmid, pMBIScmr, pTSA0A166A5J3,pB2Hopt	0	600	2	1
3b	s1030: F-plasmid, pMBIScmr, pTSA0A2H3DKU3,pB2Hopt	0	600	2	1
3b	s1030: F-plasmid, pMBIScmr, pTSS9Q22,pB2Hopt	0	700	2	1
3b	s1030: F-plasmid, pMBIScmr, pTSA0A067L3D3,pB2Hopt	0	700	2	1
3b	s1030: F-plasmid, pMBIScmr, pTSA0A1I1AC30,pB2Hopt	0	700	2	1
3b	s1030: F-plasmid, pMBIScmr, pTSA0A0D9ZGD1,pB2Hopt	0	700	2	1
3b	s1030: F-plasmid, pMBIScmr, pTSA0A0D3D8G7,pB2Hopt	0	700	2	1
3b	s1030: F-plasmid, pMBIScmr, pTSA0A0K9RZT8,pB2Hopt	0	700	2	1
3b	s1030: F-plasmid, pMBIScmr, pTSA2XI80,pB2Hopt	0	700	2	1
3b	s1030: F-plasmid, pMBIScmr, pTSF2DRF1,pB2Hopt	0	700	2	1
3b	s1030: F-plasmid, pMBIScmr, pTSA0A0D2L718,pB2Hopt	0	700	2	1
3b	s1030: F-plasmid, pMBIScmr, pTSA0A0D9X487,pB2Hopt	0	700	2	1
3b	s1030: F-plasmid, pMBIScmr, pTSA0A022S1C8,pB2Hopt	0	700	2	1
3b	s1030: F-plasmid, pMBIScmr, pTSA0A0C2TFL3,pB2Hopt	0	700	2	1
3b	s1030: F-plasmid, pMBIScmr, pTSA0A1S3XW43,pB2Hopt	0	700	2	1
3b	s1030: F-plasmid, pMBIScmr, pTSG2QRS0,pB2Hopt	0	700	2	1
3b	s1030: F-plasmid, pMBIScmr, pTSA0A0287XU99,pB2Hopt	0	700	2	1
3b	s1030: F-plasmid, pMBIScmr, pTSA0A078IZJ5,pB2Hopt	0	700	2	1
3b	s1030: F-plasmid, pMBIScmr, pTSG4TNA6,pB2Hopt	0	700	2	1
3b	s1030: F-plasmid, pMBIScmr, pTST1LTV1,pB2Hopt	0	700	2	1
3b	s1030: F-plasmid, pMBIScmr, pTSB9IF04,pB2Hopt	0	700	2	1
3b	s1030: F-plasmid, pMBIScmr, pTSA0A0G2ZSL3,pB2Hopt	0	700	2	1
3b	s1030: F-plasmid, pMBIScmr, pTSA0A0C9VSL7,pB2Hopt	0	700	2	1
3b	s1030: F-plasmid, pMBIScmr, pTSA0A1L7WMZ8,pB2Hopt	0	700	2	1
3b	s1030: F-plasmid, pMBIScmr, pTSA0A166A5J3,pB2Hopt	0	700	2	1
3b	s1030: F-plasmid, pMBIScmr, pTSA0A2H3DKU3,pB2Hopt	0	700	2	1
3b	s1030: F-plasmid, pMBIScmr, pTSS9Q22,pB2Hopt	0	800	2	1
3b	s1030: F-plasmid, pMBIScmr, pTSA0A067L3D3,pB2Hopt	0	800	2	1
3b	s1030: F-plasmid, pMBIScmr, pTSA0A1I1AC30,pB2Hopt	0	800	2	1
3b	s1030: F-plasmid, pMBIScmr, pTSA0A0D3D8G7,pB2Hopt	0	800	2	1
3b	s1030: F-plasmid, pMBIScmr, pTSA2XI80,pB2Hopt	0	800	2	1
3b	s1030: F-plasmid, pMBIScmr, pTSF2DRF1,pB2Hopt	0	800	2	1
3b	s1030: F-plasmid, pMBIScmr, pTSA0A0D2L718,pB2Hopt	0	800	2	1
3b	s1030: F-plasmid, pMBIScmr, pTSA0A0D9X487,pB2Hopt	0	800	2	1
3b	s1030: F-plasmid, pMBIScmr, pTSA0A022S1C8,pB2Hopt	0	800	2	1
3b	s1030: F-plasmid, pMBIScmr, pTSA0A0C2TFL3,pB2Hopt	0	800	2	1
3b	s1030: F-plasmid, pMBIScmr, pTSA0A1S3XW43,pB2Hopt	0	800	2	1
3b	s1030: F-plasmid, pMBIScmr, pTSG2QRS0,pB2Hopt	0	800	2	1
3b	s1030: F-plasmid, pMBIScmr, pTSA0A078IZJ5,pB2Hopt	0	800	2	1
3b	s1030: F-plasmid, pMBIScmr, pTSB9IF04,pB2Hopt	0	800	2	1
3b	s1030: F-plasmid, pMBIScmr, pTSA0A0G2ZSL3,pB2Hopt	0	800	2	1
3b	s1030: F-plasmid, pMBIScmr, pTSA0A0C9VSL7,pB2Hopt	0	800	2	1
3b	s1030: F-plasmid, pMBIScmr, pTSA0A166A5J3,pB2Hopt	0	800	2	1
3b	s1030: F-plasmid, pMBIScmr, pTSA0A2H3DKU3,pB2Hopt	0	800	2	1
3b	s1030: F-plasmid, pMBIScmr, pTSS9Q22,pB2Hopt	0	900	2	1
3b	s1030: F-plasmid, pMBIScmr, pTSA0A067L3D3,pB2Hopt	0	900	2	1
3b	s1030: F-plasmid, pMBIScmr, pTSA0A1I1AC30,pB2Hopt	0	900	2	1
3b	s1030: F-plasmid, pMBIScmr, pTSA2XI80,pB2Hopt	0	900	2	1
3b	s1030: F-plasmid, pMBIScmr, pTSF2DRF1,pB2Hopt	0	900	2	1
3b	s1030: F-plasmid, pMBIScmr, pTSA0A0D2L718,pB2Hopt	0	900	2	1
3b	s1030: F-plasmid, pMBIScmr, pTSA0A022S1C8,pB2Hopt	0	900	2	1
3b	s1030: F-plasmid, pMBIScmr, pTSA0A0C2TFL3,pB2Hopt	0	900	2	1
3b	s1030: F-plasmid, pMBIScmr, pTSA0A1S3XW43,pB2Hopt	0	900	2	1
3b	s1030: F-plasmid, pMBIScmr, pTSA0A078IZJ5,pB2Hopt	0	900	2	1
3b	s1030: F-plasmid, pMBIScmr, pTSA0A0G2ZSL3,pB2Hopt	0	900	2	1
3b	s1030: F-plasmid, pMBIScmr, pTSA0A0C9VSL7,pB2Hopt	0	900	2	1
S6	s1030: F-plasmid, pMBIScmr, pTSS9Q22,pB2Hoptx	0	0	2	1
S6	s1030: F-plasmid, pMBIScmr, pTSA0A067L3D3,pB2Hoptx	0	0	2	1
S6	s1030: F-plasmid, pMBIScmr, pTSA0A1I1AC30,pB2Hoptx	0	0	2	1
S6	s1030: F-plasmid, pMBIScmr, pTSA0A0D9ZGD1,pB2Hoptx	0	0	2	1
S6	s1030: F-plasmid, pMBIScmr, pTSA0A0D3D8G7,pB2Hoptx	0	0	2	1
S6	s1030: F-plasmid, pMBIScmr, pTSA0A0K9RZT8,pB2Hoptx	0	0	2	1
S6	s1030: F-plasmid, pMBIScmr, pTSA2XI80,pB2Hoptx	0	0	2	1
S6	s1030: F-plasmid, pMBIScmr, pTSF2DRF1,pB2Hoptx	0	0	2	1
S6	s1030: F-plasmid, pMBIScmr, pTSA0A0D2L718,pB2Hoptx	0	0	2	1
S6	s1030: F-plasmid, pMBIScmr, pTSA0A0D9X487,pB2Hoptx	0	0	2	1
S6	s1030: F-plasmid, pMBIScmr, pTSA0A022S1C8,pB2Hoptx	0	0	2	1
S6	s1030: F-plasmid, pMBIScmr, pTSA0A0C2TFL3,pB2Hoptx	0	0	2	1
S6	s1030: F-plasmid, pMBIScmr, pTSA0A1S3XW43,pB2Hoptx	0	0	2	1
S6	s1030: F-plasmid, pMBIScmr, pTSG2QRS0,pB2Hoptx	0	0	2	1
S6	s1030: F-plasmid, pMBIScmr, pTSA0A0287XU99,pB2Hoptx	0	0	2	1
S6	s1030: F-plasmid, pMBIScmr, pTSA0A078IZJ5,pB2Hoptx	0	0	2	1
S6	s1030: F-plasmid, pMBIScmr, pTSG4TNA6,pB2Hoptx	0	0	2	1
S6	s1030: F-plasmid, pMBIScmr, pTST1LTV1,pB2Hoptx	0	0	2	1
S6	s1030: F-plasmid, pMBIScmr, pTSB9IF04,pB2Hoptx	0	0	2	1
S6	s1030: F-plasmid, pMBIScmr, pTSA0A0G2ZSL3,pB2Hoptx	0	0	2	1
S6	s1030: F-plasmid, pMBIScmr, pTSA0A0C9VSL7,pB2Hoptx	0	0	2	1
S6	s1030: F-plasmid, pMBIScmr, pTSA0A1L7WMZ8,pB2Hoptx	0	0	2	1
S6	s1030: F-plasmid, pMBIScmr, pTSA0A166A5J3,pB2Hoptx	0	0	2	1
S6	s1030: F-plasmid, pMBIScmr, pTSA0A2H3DKU3,pB2Hoptx	0	0	2	1
S6	s1030: F-plasmid, pMBIScmr, pTSS9Q22,pB2Hoptx	0	200	2	1
S6	s1030: F-plasmid, pMBIScmr, pTSA0A067L3D3,pB2Hoptx	0	200	2	1
S6	s1030: F-plasmid, pMBIScmr, pTSA0A1I1AC30,pB2Hoptx	0	200	2	1
S6	s1030: F-plasmid, pMBIScmr, pTSA0A0D9ZGD1,pB2Hoptx	0	200	2	1
S6	s1030: F-plasmid, pMBIScmr, pTSA0A0D3D8G7,pB2Hoptx	0	200	2	1
S6	s1030: F-plasmid, pMBIScmr, pTSA0A0K9RZT8,pB2Hoptx	0	200	2	1
S6	s1030: F-plasmid, pMBIScmr, pTSA2XI80,pB2Hoptx	0	200	2	1
S6	s1030: F-plasmid, pMBIScmr, pTSF2DRF1,pB2Hoptx	0	200	2	1
S6	s1030: F-plasmid, pMBIScmr, pTSA0A0D2L718,pB2Hoptx	0	200	2	1
S6	s1030: F-plasmid, pMBIScmr, pTSA0A0D9X487,pB2Hoptx	0	200	2	1
S6	s1030: F-plasmid, pMBIScmr, pTSA0A022S1C8,pB2Hoptx	0	200	2	1
S6	s1030: F-plasmid, pMBIScmr, pTSA0A0C2TFL3,pB2Hoptx	0	200	2	1
S6	s1030: F-plasmid, pMBIScmr, pTSA0A1S3XW43,pB2Hoptx	0	200	2	1
S6	s1030: F-plasmid, pMBIScmr, pTSG2QRS0,pB2Hoptx	0	200	2	1
S6	s1030: F-plasmid, pMBIScmr, pTSA0A0287XU99,pB2Hoptx	0	200	2	1
S6	s1030: F-plasmid, pMBIScmr, pTSA0A078IZJ5,pB2Hoptx	0	200	2	1
S6	s1030: F-plasmid, pMBIScmr, pTSG4TNA6,pB2Hoptx	0	200	2	1
S6	s1030: F-plasmid, pMBIScmr, pTST1LTV1,pB2Hoptx	0	200	2	1
S6	s1030: F-plasmid, pMBIScmr, pTSB9IF04,pB2Hoptx	0	200	2	1
S6	s1030: F-plasmid, pMBIScmr, pTSA0A0G2ZSL3,pB2Hoptx	0	200	2	1
S6	s1030: F-plasmid, pMBIScmr, pTSA0A0C9VSL7,pB2Hoptx	0	200	2	1
S6	s1030: F-plasmid, pMBIScmr, pTSA0A1L7WMZ8,pB2Hoptx	0	200	2	1
S6	s1030: F-plasmid, pMBIScmr, pTSA0A166A5J3,pB2Hoptx	0	200	2	1
S6	s1030: F-plasmid, pMBIScmr, pTSA0A2H3DKU3,pB2Hoptx	0	200	2	1
S6	s1030: F-plasmid, pMBIScmr, pTSS9Q22,pB2Hoptx	0	300	2	1
S6	s1030: F-plasmid, pMBIScmr, pTSA0A067L3D3,pB2Hoptx	0	300	2	1
S6	s1030: F-plasmid, pMBIScmr, pTSA0A1I1AC30,pB2Hoptx	0	300	2	1
S6	s1030: F-plasmid, pMBIScmr, pTSA0A0D9ZGD1,pB2Hoptx	0	300	2	1
S6	s1030: F-plasmid, pMBIScmr, pTSA0A0D3D8G7,pB2Hoptx	0	300	2	1
S6	s1030: F-plasmid, pMBIScmr, pTSA0A0K9RZT8,pB2Hoptx	0	300	2	1
S6	s1030: F-plasmid, pMBIScmr, pTSA2XI80,pB2Hoptx	0	300	2	1
S6	s1030: F-plasmid, pMBIScmr, pTSF2DRF1,pB2Hoptx	0	300	2	1
S6	s1030: F-plasmid, pMBIScmr, pTSA0A0D2L718,pB2Hoptx	0	300	2	1
S6	s1030: F-plasmid, pMBIScmr, pTSA0A0D9X487,pB2Hoptx	0	300	2	1
S6	s1030: F-plasmid, pMBIScmr, pTSA0A022S1C8,pB2Hoptx	0	300	2	1
S6	s1030: F-plasmid, pMBIScmr, pTSA0A0C2TFL3,pB2Hoptx	0	300	2	1
S6	s1030: F-plasmid, pMBIScmr, pTSA0A1S3XW43,pB2Hoptx	0	300	2	1
S6	s1030: F-plasmid, pMBIScmr, pTSG2QRS0,pB2Hoptx	0	300	2	1
S6	s1030: F-plasmid, pMBIScmr, pTSA0A0287XU99,pB2Hoptx	0	300	2	1
S6	s1030: F-plasmid, pMBIScmr, pTSA0A078IZJ5,pB2Hoptx	0	300	2	1
S6	s1030: F-plasmid, pMBIScmr, pTSG4TNA6,pB2Hoptx	0	300	2	1
S6	s1030: F-plasmid, pMBIScmr, pTST1LTV1,pB2Hoptx	0	300	2	1
S6	s1030: F-plasmid, pMBIScmr, pTSB9IF04,pB2Hoptx	0	300	2	1
S6	s1030: F-plasmid, pMBIScmr, pTSA0A0G2ZSL3,pB2Hoptx	0	300	2	1
S6	s1030: F-plasmid, pMBIScmr, pTSA0A0C9VSL7,pB2Hoptx	0	300	2	1
S6	s1030: F-plasmid, pMBIScmr, pTSA0A1L7WMZ8,pB2Hoptx	0	300	2	1
S6	s1030: F-plasmid, pMBIScmr, pTSA0A166A5J3,pB2Hoptx	0	300	2	1
S6	s1030: F-plasmid, pMBIScmr, pTSA0A2H3DKU3,pB2Hoptx	0	300	2	1
S6	s1030: F-plasmid, pMBIScmr, pTSS9Q22,pB2Hoptx	0	400	2	1
S6	s1030: F-plasmid, pMBIScmr, pTSA0A067L3D3,pB2Hoptx	0	400	2	1
S6	s1030: F-plasmid, pMBIScmr, pTSA0A1I1AC30,pB2Hoptx	0	400	2	1
S6	s1030: F-plasmid, pMBIScmr, pTSA0A0D9ZGD1,pB2Hoptx	0	400	2	1
S6	s1030: F-plasmid, pMBIScmr, pTSA0A0D3D8G7,pB2Hoptx	0	400	2	1
S6	s1030: F-plasmid, pMBIScmr, pTSA0A0K9RZT8,pB2Hoptx	0	400	2	1
S6	s1030: F-plasmid, pMBIScmr, pTSA2XI80,pB2Hoptx	0	400	2	1
S6	s1030: F-plasmid, pMBIScmr, pTSF2DRF1,pB2Hoptx	0	400	2	1
S6	s1030: F-plasmid, pMBIScmr, pTSA0A0D2L718,pB2Hoptx	0	400	2	1
S6	s1030: F-plasmid, pMBIScmr, pTSA0A0D9X487,pB2Hoptx	0	400	2	1
S6	s1030: F-plasmid, pMBIScmr, pTSA0A022S1C8,pB2Hoptx	0	400	2	1
S6	s1030: F-plasmid, pMBIScmr, pTSA0A0C2TFL3,pB2Hoptx	0	400	2	1
S6	s1030: F-plasmid, pMBIScmr, pTSA0A1S3XW43,pB2Hoptx	0	400	2	1
S6	s1030: F-plasmid, pMBIScmr, pTSG2QRS0,pB2Hoptx	0	400	2	1
S6	s1030: F-plasmid, pMBIScmr, pTSA0A0287XU99,pB2Hoptx	0	400	2	1
S6	s1030: F-plasmid, pMBIScmr, pTSA0A078IZJ5,pB2Hoptx	0	400	2	1
S6	s1030: F-plasmid, pMBIScmr, pTSG4TNA6,pB2Hoptx	0	400	2	1
S6	s1030: F-plasmid, pMBIScmr, pTST1LTV1,pB2Hoptx	0	400	2	1
S6	s1030: F-plasmid, pMBIScmr, pTSB9IF04,pB2Hoptx	0	400	2	1
S6	s1030: F-plasmid, pMBIScmr, pTSA0A0G2ZSL3,pB2Hoptx	0	400	2	1
S6	s1030: F-plasmid, pMBIScmr, pTSA0A0C9VSL7,pB2Hoptx	0	400	2	1
S6	s1030: F-plasmid, pMBIScmr, pTSA0A1L7WMZ8,pB2Hoptx	0	400	2	1
S6	s1030: F-plasmid, pMBIScmr, pTSA0A166A5J3,pB2Hoptx	0	400	2	1
S6	s1030: F-plasmid, pMBIScmr, pTSA0A2H3DKU3,pB2Hoptx	0	400	2	1
S6	s1030: F-plasmid, pMBIScmr, pTSS9Q22,pB2Hoptx	0	500	2	1
S6	s1030: F-plasmid, pMBIScmr, pTSA0A067L3D3,pB2Hoptx	0	500	2	1
S6	s1030: F-plasmid, pMBIScmr, pTSA0A1I1AC30,pB2Hoptx	0	500	2	1
S6	s1030: F-plasmid, pMBIScmr, pTSA0A0D9ZGD1,pB2Hoptx	0	500	2	1
S6	s1030: F-plasmid, pMBIScmr, pTSA0A0D3D8G7,pB2Hoptx	0	500	2	1
S6	s1030: F-plasmid, pMBIScmr, pTSA0A0K9RZT8,pB2Hoptx	0	500	2	1
S6	s1030: F-plasmid, pMBIScmr, pTSA2XI80,pB2Hoptx	0	500	2	1
S6	s1030: F-plasmid, pMBIScmr, pTSF2DRF1,pB2Hoptx	0	500	2	1
S6	s1030: F-plasmid, pMBIScmr, pTSA0A0D2L718,pB2Hoptx	0	500	2	1
S6	s1030: F-plasmid, pMBIScmr, pTSA0A0D9X487,pB2Hoptx	0	500	2	1
S6	s1030: F-plasmid, pMBIScmr, pTSA0A022S1C8,pB2Hoptx	0	500	2	1
S6	s1030: F-plasmid, pMBIScmr, pTSA0A0C2TFL3,pB2Hoptx	0	500	2	1
S6	s1030: F-plasmid, pMBIScmr, pTSA0A1S3XW43,pB2Hoptx	0	500	2	1
S6	s1030: F-plasmid, pMBIScmr, pTSG2QRS0,pB2Hoptx	0	500	2	1
S6	s1030: F-plasmid, pMBIScmr, pTSA0A0287XU99,pB2Hoptx	0	500	2	1
S6	s1030: F-plasmid, pMBIScmr, pTSA0A078IZJ5,pB2Hoptx	0	500	2	1
S6	s1030: F-plasmid, pMBIScmr, pTSG4TNA6,pB2Hoptx	0	500	2	1
S6	s1030: F-plasmid, pMBIScmr, pTST1LTV1,pB2Hoptx	0	500	2	1
S6	s1030: F-plasmid, pMBIScmr, pTSB9IF04,pB2Hoptx	0	500	2	1
S6	s1030: F-plasmid, pMBIScmr, pTSA0A0G2ZSL3,pB2Hoptx	0	500	2	1
S6	s1030: F-plasmid, pMBIScmr, pTSA0A0C9VSL7,pB2Hoptx	0	500	2	1
S6	s1030: F-plasmid, pMBIScmr, pTSA0A1L7WMZ8,pB2Hoptx	0	500	2	1
S6	s1030: F-plasmid, pMBIScmr, pTSA0A166A5J3,pB2Hoptx	0	500	2	1
S6	s1030: F-plasmid, pMBIScmr, pTSA0A2H3DKU3,pB2Hoptx	0	500	2	1
S6	s1030: F-plasmid, pMBIScmr, pTSS9Q22,pB2Hoptx	0	600	2	1
S6	s1030: F-plasmid, pMBIScmr, pTSA0A067L3D3,pB2Hoptx	0	600	2	1
S6	s1030: F-plasmid, pMBIScmr, pTSA0A1I1AC30,pB2Hoptx	0	600	2	1
S6	s1030: F-plasmid, pMBIScmr, pTSA0A0D9ZGD1,pB2Hoptx	0	600	2	1
S6	s1030: F-plasmid, pMBIScmr, pTSA0A0D3D8G7,pB2Hoptx	0	600	2	1
S6	s1030: F-plasmid, pMBIScmr, pTSA0A0K9RZT8,pB2Hoptx	0	600	2	1
S6	s1030: F-plasmid, pMBIScmr, pTSA2XI80,pB2Hoptx	0	600	2	1
S6	s1030: F-plasmid, pMBIScmr, pTSF2DRF1,pB2Hoptx	0	600	2	1
S6	s1030: F-plasmid, pMBIScmr, pTSA0A0D2L718,pB2Hoptx	0	600	2	1
S6	s1030: F-plasmid, pMBIScmr, pTSA0A0D9X487,pB2Hoptx	0	600	2	1
S6	s1030: F-plasmid, pMBIScmr, pTSA0A022S1C8,pB2Hoptx	0	600	2	1
S6	s1030: F-plasmid, pMBIScmr, pTSA0A0C2TFL3,pB2Hoptx	0	600	2	1
S6	s1030: F-plasmid, pMBIScmr, pTSA0A1S3XW43,pB2Hoptx	0	600	2	1
S6	s1030: F-plasmid, pMBIScmr, pTSG2QRS0,pB2Hoptx	0	600	2	1
S6	s1030: F-plasmid, pMBIScmr, pTSA0A0287XU99,pB2Hoptx	0	600	2	1
S6	s1030: F-plasmid, pMBIScmr, pTSA0A078IZJ5,pB2Hoptx	0	600	2	1
S6	s1030: F-plasmid, pMBIScmr, pTSG4TNA6,pB2Hoptx	0	600	2	1
S6	s1030: F-plasmid, pMBIScmr, pTST1LTV1,pB2Hoptx	0	600	2	1
S6	s1030: F-plasmid, pMBIScmr, pTSB9IF04,pB2Hoptx	0	600	2	1
S6	s1030: F-plasmid, pMBIScmr, pTSA0A0G2ZSL3,pB2Hoptx	0	600	2	1
S6	s1030: F-plasmid, pMBIScmr, pTSA0A0C9VSL7,pB2Hoptx	0	600	2	1
S6	s1030: F-plasmid, pMBIScmr, pTSA0A1L7WMZ8,pB2Hoptx	0	600	2	1
S6	s1030: F-plasmid, pMBIScmr, pTSA0A166A5J3,pB2Hoptx	0	600	2	1
S6	s1030: F-plasmid, pMBIScmr, pTSA0A2H3DKU3,pB2Hoptx	0	600	2	1
S6	s1030: F-plasmid, pMBIScmr, pTSS9Q22,pB2Hoptx	0	700	2	1
S6	s1030: F-plasmid, pMBIScmr, pTSA0A067L3D3,pB2Hoptx	0	700	2	1
S6	s1030: F-plasmid, pMBIScmr, pTSA0A1I1AC30,pB2Hoptx	0	700	2	1
S6	s1030: F-plasmid, pMBIScmr, pTSA0A0D9ZGD1,pB2Hoptx	0	700	2	1
S6	s1030: F-plasmid, pMBIScmr, pTSA0A0D3D8G7,pB2Hoptx	0	700	2	1
S6	s1030: F-plasmid, pMBIScmr, pTSA0A0K9RZT8,pB2Hoptx	0	700	2	1
S6	s1030: F-plasmid, pMBIScmr, pTSA2XI80,pB2Hoptx	0	700	2	1
S6	s1030: F-plasmid, pMBIScmr, pTSF2DRF1,pB2Hoptx	0	700	2	1
S6	s1030: F-plasmid, pMBIScmr, pTSA0A0D2L718,pB2Hoptx	0	700	2	1
S6	s1030: F-plasmid, pMBIScmr, pTSA0A0D9X487,pB2Hoptx	0	700	2	1
S6	s1030: F-plasmid, pMBIScmr, pTSA0A022S1C8,pB2Hoptx	0	700	2	1
S6	s1030: F-plasmid, pMBIScmr, pTSA0A0C2TFL3,pB2Hoptx	0	700	2	1
S6	s1030: F-plasmid, pMBIScmr, pTSA0A1S3XW43,pB2Hoptx	0	700	2	1
S6	s1030: F-plasmid, pMBIScmr, pTSG2QRS0,pB2Hoptx	0	700	2	1
S6	s1030: F-plasmid, pMBIScmr, pTSA0A0287XU99,pB2Hoptx	0	700	2	1
S6	s1030: F-plasmid, pMBIScmr, pTSA0A078IZJ5,pB2Hoptx	0	700	2	1
S6	s1030: F-plasmid, pMBIScmr, pTSG4TNA6,pB2Hoptx	0	700	2	1
S6	s1030: F-plasmid, pMBIScmr, pTST1LTV1,pB2Hoptx	0	700	2	1
S6	s1030: F-plasmid, pMBIScmr, pTSB9IF04,pB2Hoptx	0	700	2	1
S6	s1030: F-plasmid, pMBIScmr, pTSA0A0G2ZSL3,pB2Hoptx	0	700	2	1
S6	s1030: F-plasmid, pMBIScmr, pTSA0A0C9VSL7,pB2Hoptx	0	700	2	1
S6	s1030: F-plasmid, pMBIScmr, pTSA0A1L7WMZ8,pB2Hoptx	0	700	2	1
S6	s1030: F-plasmid, pMBIScmr, pTSA0A166A5J3,pB2Hoptx	0	700	2	1
S6	s1030: F-plasmid, pMBIScmr, pTSA0A2H3DKU3,pB2Hoptx	0	700	2	1
S6	s1030: F-plasmid, pMBIScmr, pTSS9Q22,pB2Hoptx	0	800	2	1
S6	s1030: F-plasmid, pMBIScmr, pTSA0A067L3D3,pB2Hoptx	0	800	2	1
S6	s1030: F-plasmid, pMBIScmr, pTSA0A1I1AC30,pB2Hoptx	0	800	2	1
S6	s1030: F-plasmid, pMBIScmr, pTSA0A0D3D8G7,pB2Hoptx	0	800	2	1
S6	s1030: F-plasmid, pMBIScmr, pTSA2XI80,pB2Hoptx	0	800	2	1
S6	s1030: F-plasmid, pMBIScmr, pTSF2DRF1,pB2Hoptx	0	800	2	1
S6	s1030: F-plasmid, pMBIScmr, pTSA0A0D2L718,pB2Hoptx	0	800	2	1
S6	s1030: F-plasmid, pMBIScmr, pTSA0A0D9X487,pB2Hoptx	0	800	2	1
S6	s1030: F-plasmid, pMBIScmr, pTSA0A022S1C8,pB2Hoptx	0	800	2	1
S6	s1030: F-plasmid, pMBIScmr, pTSA0A0C2TFL3,pB2Hoptx	0	800	2	1
S6	s1030: F-plasmid, pMBIScmr, pTSA0A1S3XW43,pB2Hoptx	0	800	2	1
S6	s1030: F-plasmid, pMBIScmr, pTSG2QRS0,pB2Hoptx	0	800	2	1
S6	s1030: F-plasmid, pMBIScmr, pTSA0A078IZJ5,pB2Hoptx	0	800	2	1
S6	s1030: F-plasmid, pMBIScmr, pTSB9IF04,pB2Hoptx	0	800	2	1
S6	s1030: F-plasmid, pMBIScmr, pTSA0A0G2ZSL3,pB2Hoptx	0	800	2	1
S6	s1030: F-plasmid, pMBIScmr, pTSA0A0C9VSL7,pB2Hoptx	0	800	2	1
S6	s1030: F-plasmid, pMBIScmr, pTSA0A166A5J3,pB2Hoptx	0	800	2	1
S6	s1030: F-plasmid, pMBIScmr, pTSA0A2H3DKU3,pB2Hoptx	0	800	2	1
S6	s1030: F-plasmid, pMBIScmr, pTSS9Q22,pB2Hoptx	0	900	2	1
S6	s1030: F-plasmid, pMBIScmr, pTSA0A067L3D3,pB2Hoptx	0	900	2	1
S6	s1030: F-plasmid, pMBIScmr, pTSA0A1I1AC30,pB2Hoptx	0	900	2	1
S6	s1030: F-plasmid, pMBIScmr, pTSA2XI80,pB2Hoptx	0	900	2	1
S6	s1030: F-plasmid, pMBIScmr, pTSF2DRF1,pB2Hoptx	0	900	2	1
S6	s1030: F-plasmid, pMBIScmr, pTSA0A0D2L718,pB2Hoptx	0	900	2	1
S6	s1030: F-plasmid, pMBIScmr, pTSA0A022S1C8,pB2Hoptx	0	900	2	1
S6	s1030: F-plasmid, pMBIScmr, pTSA0A0C2TFL3,pB2Hoptx	0	900	2	1
S6	s1030: F-plasmid, pMBIScmr, pTSA0A1S3XW43,pB2Hoptx	0	900	2	1
S6	s1030: F-plasmid, pMBIScmr, pTSA0A078IZJ5,pB2Hoptx	0	900	2	1
S6	s1030: F-plasmid, pMBIScmr, pTSA0A0G2ZSL3,pB2Hoptx	0	900	2	1
S6	s1030: F-plasmid, pMBIScmr, pTSA0A0C9VSL7,pB2Hoptx	0	900	2	1
5a	s1030: F-plasmid, pB2H2	0	0	2	1
5a	s1030: F-plasmid, pB2H2*	0	0	2	1
5a	s1030: F-plasmid, pB2H6	0	0	2	1
5a	s1030: F-plasmid, pB2H6*	0	0	2	1
5a	s1030: F-plasmid, pB2H12	0	0	2	1
5a	s1030: F-plasmid, pB2H12*	0	0	2	1
5a	s1030: F-plasmid, pB2H2	0	200	2	1
5a	s1030: F-plasmid, pB2H2*	0	200	2	1
5a	s1030: F-plasmid, pB2H6	0	200	2	1
5a	s1030: F-plasmid, pB2H6*	0	200	2	1
5a	s1030: F-plasmid, pB2H12	0	200	2	1
5a	s1030: F-plasmid, pB2H12*	0	200	2	1
5a	s1030: F-plasmid, pB2H2	0	400	2	1
5a	s1030: F-plasmid, pB2H2*	0	400	2	1
5a	s1030: F-plasmid, pB2H6	0	400	2	1
5a	s1030: F-plasmid, pB2H6*	0	400	2	1
5a	s1030: F-plasmid, pB2H12	0	400	2	1
5a	s1030: F-plasmid, pB2H12*	0	400	2	1
5a	s1030: F-plasmid, pB2H2	0	600	2	1
5a	s1030: F-plasmid, pB2H2*	0	600	2	1
5a	s1030: F-plasmid, pB2H6	0	600	2	1
5a	s1030: F-plasmid, pB2H6*	0	600	2	1
5a	s1030: F-plasmid, pB2H12	0	600	2	1
5a	s1030: F-plasmid, pB2H12*	0	600	2	1
5a	s1030: F-plasmid, pB2H2	0	800	2	1
5a	s1030: F-plasmid, pB2H2*	0	800	2	1
5a	s1030: F-plasmid, pB2H6	0	800	2	1
5a	s1030: F-plasmid, pB2H6*	0	800	2	1
5a	s1030: F-plasmid, pB2H12	0	800	2	1
5a	s1030: F-plasmid, pB2H12*	0	800	2	1
5b	s1030: F-plasmid, pMBIScmr, pADS, pB2H	0	0	2	1
5b	s1030: F-plasmid, pMBIScmr, pADS, pB2H2	0	0	2	1
5b	s1030: F-plasmid, pMBIScmr, pABA, pB2H	0	0	2	1
5b	s1030: F-plasmid, pMBIScmr, pABA, pB2H2	0	0	2	1
5b	s1030: F-plasmid, pMBIScmr, pADS, pB2H	0	200	2	1
5b	s1030: F-plasmid, pMBIScmr, pADS, pB2H2	0	200	2	1
5b	s1030: F-plasmid, pMBIScmr, pABA, pB2H	0	200	2	1
5b	s1030: F-plasmid, pMBIScmr, pABA, pB2H2	0	200	2	1
5b	s1030: F-plasmid, pMBIScmr, pADS, pB2H	0	400	2	1
5b	s1030: F-plasmid, pMBIScmr, pADS, pB2H2	0	400	2	1
5b	s1030: F-plasmid, pMBIScmr, pABA, pB2H	0	400	2	1
5b	s1030: F-plasmid, pMBIScmr, pABA, pB2H2	0	400	2	1
5b	s1030: F-plasmid, pMBIScmr, pADS, pB2H	0	600	2	1
5b	s1030: F-plasmid, pMBIScmr, pADS, pB2H2	0	600	2	1
5b	s1030: F-plasmid, pMBIScmr, pABA, pB2H	0	600	2	1
5b	s1030: F-plasmid, pMBIScmr, pABA, pB2H2	0	600	2	1
5b	s1030: F-plasmid, pMBIScmr, pADS, pB2H	0	800	2	1
5b	s1030: F-plasmid, pMBIScmr, pADS, pB2H2	0	800	2	1
5b	s1030: F-plasmid, pMBIScmr, pABA, pB2H	0	800	2	1
5b	s1030: F-plasmid, pMBIScmr, pABA, pB2H2	0	800	2	1
Certain strains are displayed in multiple figures. In all such cases, the "biological replicates" and "experimental sets" columns indicate the total number of replicates/sets for that strain.
*Biological replicates indicate the total number, across all experimental sets, of distinct bacterial colonies grown up for the study. Replicates not displayed elsewhere are shown in Fig. S11.
**Experimental sets indicate the number of times the experiment was run, with the total number of biological replicates summing to the value in the "biological replicates" column.
