# Supplementary material for: Microbially guided discovery and biosynthesis of biologically active natural products
Source: Research Square preprint supplement (doi:10.21203/rs.3.rs-92116/v1), 2020-10-20
Supplement: Supplementary file 4 [file 7d46cdde0d63d7037dc34cf8.xlsx]

## Sheet: Sheet1
Experiment	Strain	Arabinose	avg. Lum/OD600	standard error	Sample size (n)**	Experimental sets***
Figure	Name (cell line: plasmids)****	w/v %			#	#
1b	s1030: F-plasmid, pB2H1b	0	70.5966	8.09163	3	1
1b	s1030: F-plasmid, pB2H1b.mut	0	91.5045	16.0978	3	1
1b	s1030: F_plasmid, pB2H1b, pBAD1b.Src	0	36.0831	9.82618	3	1
1b	s1030: F_plasmid, pB2H1b, pBAD1b.SH2	0	37.266	18.0171	3	1
1b	s1030: F_plasmid, pB2H1b, pBAD1b.S	0	69.6414	7.0203	3	1
1b	s1030: F_plasmid, pB2H1b, pBAD1b.all	0	47.1491	9.19221	3	1
1b	s1030: F_plasmid, pB2H1b, pBAD1b.Src	0.0002	191.244	7.86313	3	1
1b	s1030: F_plasmid, pB2H1b, pBAD1b.SH2	0.0002	51.4301	17.8159	3	1
1b	s1030: F_plasmid, pB2H1b, pBAD1b.S	0.0002	72.4754	10.3696	3	1
1b	s1030: F_plasmid, pB2H1b, pBAD1b.all	0.0002	9.16845	3.55342	3	1
1b	s1030: F_plasmid, pB2H1b, pBAD1b.Src	0.002	192.101	3.53001	3	1
1b	s1030: F_plasmid, pB2H1b, pBAD1b.SH2	0.002	25.6668	5.34458	3	1
1b	s1030: F_plasmid, pB2H1b, pBAD1b.S	0.002	59.2603	7.06698	3	1
1b	s1030: F_plasmid, pB2H1b, pBAD1b.all	0.002	0*	0	3	1
1b	s1030: F_plasmid, pB2H1b, pBAD1b.Src	0.02	161.076	16.9896	3	1
1b	s1030: F_plasmid, pB2H1b, pBAD1b.SH2	0.02	32.0638	10.6126	3	1
1b	s1030: F_plasmid, pB2H1b, pBAD1b.S	0.02	71.3805	5.09591	3	1
1b	s1030: F_plasmid, pB2H1b, pBAD1b.all	0.02	0	0	3	1
1c	s1030: F-plasmid, pB2H1c.p130cas, pBAD1b.Src	0	169.717	13.9362	3	3
1c	s1030: F-plasmid, pB2H1c.midT, pBAD1b.Src	0	477.806	31.892	3	3
1c	s1030: F-plasmid, pB2H1c.EGFR, pBAD1b.Src	0	97.3483	4.75836	3	3
1c	s1030: F-plasmid, pB2H1c.ShcA, pBAD1b.Src	0	63.9078	8.02492	3	3
1c	s1030: F-plasmid, pB2H1c.p130cas, pBAD1b.Src	0.0002	618.586	38.9598	3	3
1c	s1030: F-plasmid, pB2H1c.midT, pBAD1b.Src	0.0002	2416.29	118.774	3	3
1c	s1030: F-plasmid, pB2H1c.EGFR, pBAD1b.Src	0.0002	168.46	11.0447	3	3
1c	s1030: F-plasmid, pB2H1c.ShcA, pBAD1b.Src	0.0002	71.5981	10.0171	3	3
1c	s1030: F-plasmid, pB2H1c.p130cas, pBAD1b.Src	0.002	343.061	19.2667	3	3
1c	s1030: F-plasmid, pB2H1c.midT, pBAD1b.Src	0.002	1356.93	34.6343	3	3
1c	s1030: F-plasmid, pB2H1c.EGFR, pBAD1b.Src	0.002	84.2759	10.2947	3	3
1c	s1030: F-plasmid, pB2H1c.ShcA, pBAD1b.Src	0.002	37.5945	5.89588	3	3
1c	s1030: F-plasmid, pB2H1c.p130cas, pBAD1b.Src	0.02	288.097	22.6325	3	3
1c	s1030: F-plasmid, pB2H1c.midT, pBAD1b.Src	0.02	1034.45	39.2835	3	3
1c	s1030: F-plasmid, pB2H1c.EGFR, pBAD1b.Src	0.02	71.4873	7.39104	3	3
1c	s1030: F-plasmid, pB2H1c.ShcA, pBAD1b.Src	0.02	21.569	6.12445	3	3
1d	s1030: F-plasmid, pB2H1c.p130cas, pBAD1d	0	126.577	14.5076	3	3
1d	s1030: F-plasmid, pB2H1c.midT, pBAD1d	0	114.909	12.6422	3	3
1d	s1030: F-plasmid, pB2H1c.p130cas, pBAD1d.mut	0	117.564	13.1986	3	3
1d	s1030: F-plasmid, pB2H1c.midT, pBAD1d.mut	0	304.95	56.6753	3	3
1d	s1030: F-plasmid, pB2H1c.p130cas, pBAD1d	0.0002	116.289	13.863	3	3
1d	s1030: F-plasmid, pB2H1c.midT, pBAD1d	0.0002	377.542	40.3571	3	3
1d	s1030: F-plasmid, pB2H1c.p130cas, pBAD1d.mut	0.0002	304.694	44.8744	3	3
1d	s1030: F-plasmid, pB2H1c.midT, pBAD1d.mut	0.0002	1917.79	165.716	3	3
1d	s1030: F-plasmid, pB2H1c.p130cas, pBAD1d	0.002	82.3785	10.6408	3	3
1d	s1030: F-plasmid, pB2H1c.midT, pBAD1d	0.002	215.96	16.4025	3	3
1d	s1030: F-plasmid, pB2H1c.p130cas, pBAD1d.mut	0.002	237.068	27.3009	3	3
1d	s1030: F-plasmid, pB2H1c.midT, pBAD1d.mut	0.002	1093.92	60.0644	3	3
1d	s1030: F-plasmid, pB2H1c.p130cas, pBAD1d	0.02	55.4921	12.1957	3	3
1d	s1030: F-plasmid, pB2H1c.midT, pBAD1d	0.02	141.673	18.6786	3	3
1d	s1030: F-plasmid, pB2H1c.p130cas, pBAD1d.mut	0.02	161.241	16.5827	3	3
1d	s1030: F-plasmid, pB2H1c.midT, pBAD1d.mut	0.02	776.419	56.9847	3	3
1d	s1030: F-plasmid, pB2Hs1.3RBS30	0	5.40358	5.40358	3	1
1d	s1030: F-plasmid, pB2Hs1.3RBS30.mut	0	2010.97	45.1678	3	1
1d	s1030: F-plasmid, pB2Hs1.3RBS34	0	74.6358	35.3445	3	1
1d	s1030: F-plasmid, pB2Hs1.3RBS34.mut	0	1713.85	137.825	3	1
S1	s1030: F-plasmid, pB2Hs1.1Pro1	0	202.246	16.0451	3	1
S1	s1030: F-plasmid, pB2Hs1.1Pro1.mut	0	92.1782	19.4467	3	1
S1	s1030: F-plasmid, pB2Hs1.1ProD	0	778.976	44.3619	3	1
S1	s1030: F-plasmid, pB2Hs1.1ProD.mut	0	30.7935	18.8543	3	1
S1	s1030: F-plasmid, pB2Hs1.2pro	0	1106.23	44.4669	3	1
S1	s1030: F-plasmid, pB2Hs1.2pro.mut	0	15.261	15.261	3	1
S1	s1030: F-plasmid, pB2Hs1.2sal28	0	1265.31	76.9935	3	1
S1	s1030: F-plasmid, pB2Hs1.2sal28.mut	0	0	0	3	1
S1	s1030: F-plasmid, pB2Hs1.3RBS30	0	5.40358	5.40358	3	1
S1	s1030: F-plasmid, pB2Hs1.3RBS30.mut	0	2010.97	45.1678	3	1
S1	s1030: F-plasmid, pB2Hs1.3RBS34	0	74.6358	35.3445	3	1
S1	s1030: F-plasmid, pB2Hs1.3RBS34.mut	0	1713.85	137.825	3	1
ED=extended data figure
*Values denoted as "0" indicate a lum value lower than that of the media blank.
**Sample size indicates the number of biological replicates used in the study, i.e. the number of distinct bacterial colonies grown up for the study.
***Experimental sets indicates the number of times the experiment was run (with the indicated number of biological replicates).
****Plasmid details are available in Supplementary Table 2.
