# Supplementary material for: Microbially guided discovery and biosynthesis of biologically active natural products
Source: Research Square preprint supplement (doi:10.21203/rs.3.rs-92116/v1), 2020-10-20
Supplement: Supplementary file 5 [file 9f2fbcde89ec4ab973f7e62e.xlsx]

## Sheet: Sheet1
	Strain	Compound	Culture volume	Culture duration	Average concentration	standard deviation	Sample size (n)*	Experimental sets**
Figure	Name	Name	mL	hours	uM	uM	#	#
2g	s1030: pMBISCmR, pB2Hopt, pTSads	Amorphadiene	10	72	86.1163	16.1116	3	1
2g	s1030: pMBISCmR, pB2Hopt, pTSaba	Alpha bisabolene	10	72	25.9825	5.1898	3	1
S3a	s1030: pMBIS, pTSads	Total Terpenes	10	72	63.0187	12.9956	3	1
S3a	s1030: pMBIS, pTSghs	Total Terpenes	10	72	0.610178	0.064392	3	1
S3a	s1030: pMBIS, pTStxs	Total Terpenes	10	72	5.17569	0.944046	3	1
S3a	s1030: pMBIS, pTSabs	Total Terpenes	10	72	4.10985	1.89785	3	1
S3a	s1030: pMBIS, pTSaba	Total Terpenes	10	72	21.4172	1.16231	3	1
S3a	s1030: pMBIS, pB2Hopt, pTSads	Total Terpenes	10	72	86.1163	16.1116	3	1
S3a	s1030: pMBIS, pB2Hopt, pTSghs	Total Terpenes	10	72	2.86467	0.512911	3	1
S3a	s1030: pMBIS, pB2Hopt, pTStxs	Total Terpenes	10	72	6.02285	0.419263	3	1
S3a	s1030: pMBIS, pB2Hopt, pTSabs	Total Terpenes	10	72	2.18536	0.293651	3	1
S3a	s1030: pMBIS, pB2Hopt, pTSaba	Total Terpenes	10	72	25.9825	5.1898	3	1
3c	s1030: pMBISCmR, pB2Hopt, pTSads	(+)1-(10),4 cadinadiene	10	72	33.0285	18.4286	3	2
5c	s1030: pMBISCmR, pB2Hopt, pTSads	Amorphadiene	10	72	19.6685	4.64567	3	2
5c	s1030: pMBISCmR, pB2H2, pTSads	Amorphadiene	10	72	24.0865	8.90063	3	2
5c	s1030: pMBISCmR, pB2Hopt, pTSaba	Alpha bisabolene	10	72	21.9194	15.0571	3	2
5c	s1030: pMBISCmR, pB2H2, pTSaba	Alpha bisabolene	10	72	13.9694	3.88546	3	2
*Sample size indicates the number of biological replicates used in the study, i.e. the number of distinct bacterial colonies grown up for the study
**Experimental sets indicates the number of times the experiment was run (with the indicated number of biological replicates)
